1 **iRhom2 regulates ERBB signalling to promote KRAS-driven**  
2 **oncogenesis**

3

4

5

6 Boris Sieber<sup>a,c,1</sup>, Fangfang Lu<sup>a,1</sup>, Stephen M. Stribbling<sup>b,d</sup>, Adam G. Grieve<sup>a</sup>, Anderson J.  
7 Ryan<sup>b</sup>, Matthew Freeman<sup>a,2</sup>

8

9

10

11 <sup>a</sup>Sir William Dunn School of Pathology, University of Oxford, Oxford, United Kingdom

12 <sup>b</sup>Department of Oncology, University of Oxford, Oxford, United Kingdom

13

14 Current addresses:

15 <sup>c</sup>Department of Fundamental Microbiology, University of Lausanne, Lausanne, Switzerland

16 <sup>d</sup>Theolytics Ltd., The Sherard Building, Edmund Halley Road, Oxford, United Kingdom

17

18 <sup>1</sup>B.S. and F.L. contributed equally to this work.

19 <sup>2</sup>To whom correspondence should be addressed. Email: [matthew.freeman@path.ox.ac.uk](mailto:matthew.freeman@path.ox.ac.uk)

20

21

22

23 **Key words:** KRAS, iRhom2, RHBDF2, ERBB, EGFR, ADAM17, A549

## 24 **Abstract**

25

26 Dysregulation of the ERBB/EGFR signalling pathway causes multiple types of cancer (1, 2).  
27 Accordingly, ADAM17, the primary shedding enzyme that releases and activates ERBB  
28 ligands, is tightly regulated. It has recently become clear that iRhoms, inactive members of  
29 the rhomboid-like superfamily, are regulatory cofactors for ADAM17 (3, 4). Here we show  
30 that oncogenic KRAS mutants target the cytoplasmic domain of iRhom2 to induce ADAM17-  
31 dependent shedding and the release of ERBB ligands. Activation of ERK1/2 by oncogenic  
32 KRAS induces the phosphorylation of iRhom2, recruitment of the phospho-binding 14-3-3  
33 proteins, and consequent ADAM17-dependent shedding of ERBB ligands. In addition,  
34 cancer-associated mutations in iRhom2 act as sensitisers in this pathway by further  
35 increasing KRAS-induced shedding of ERBB ligands. This mechanism is conserved in lung  
36 cancer cells, where iRhom activity is required for tumour xenograft growth. In this context,  
37 the activity of oncogenic KRAS is modulated by the iRhom2-dependent release of ERBB  
38 ligands, thus placing iRhom2 as a central component of a positive feedback loop in lung  
39 cancer cells. Overall, the cytoplasmic domain of iRhom2 is a critical component of KRAS-  
40 induced oncogenesis of lung cancer cells. Both ADAM17 and iRhom2 have also been  
41 implicated in a wide range of other cancers (5-10), so the mechanism we have revealed may  
42 also have wider oncogenic significance.

43

44

## 45 **Introduction**

46

47 The ERBB/EGFR signalling pathway is dysregulated in numerous cancers, especially of the  
48 lung, breast and ovary (1, 2). In addition to oncogenic receptor mutations, tumorigenesis can  
49 be driven by excess ERBB ligand production (11). ERBB family ligands are mostly  
50 synthesised as type I transmembrane domain proteins, and become active upon proteolytic  
51 cleavage and release (shedding) from the plasma membrane. Thus, shedding of ERBB  
52 ligands is a primary regulator of signalling that controls pathogenesis as well as cell  
53 proliferation, survival and differentiation.

54

55 This mode of regulation puts into the spotlight the enzymes responsible for shedding  
56 ligands. The metalloprotease ADAM17 is the most widespread sheddase of ERBB ligands,  
57 as well as controlling the release of many other growth factors, cytokines and other cell  
58 surface proteins (12). Consistent with its potency, an intricate regulatory mechanism exists  
59 to control ADAM17, centred on iRhom1 and iRhom2, which are rhomboid-like proteins that  
60 act as ADAM17 cofactors (4). For example, iRhom2 is required for the maturation and

61 subsequent activation at the plasma membrane of ADAM17 to catalyse the shedding of  
62 TNF $\alpha$ , the primary inflammatory cytokine. This plasma membrane activation of ADAM17 can  
63 be triggered by ERK1/2-dependent phosphorylation of the cytoplasmic domain of iRhom2  
64 (13, 14).

65

66 Several lines of evidence have implicated iRhoms and ADAM17 in tumorigenesis,  
67 especially in lung, breast, cervical, oesophageal and colorectal cancers. iRhom2 and  
68 ADAM17 levels increase during cancer progression and correlate with lower survival rates  
69 (5-7, 15-18). The most direct link between the iRhoms and cancer are mutations in the  
70 cytoplasmic domain of iRhom2, which cause a rare familial syndrome, tylosis with  
71 oesophageal cancer (TOC), characterised by a very high lifetime risk of developing  
72 oesophageal cancer (8, 19-22). Increased activity of ADAM17 has been observed for  
73 *iRhom2*<sup>TOC</sup> mutations (23, 24) but, despite this strong genetic link, the precise mechanistic  
74 role of iRhoms in oncogenic signalling has been poorly explored.

75

76 ADAM17 is better characterised than iRhoms with respect to cancer, although until  
77 recently it too has not been the subject of the intense focus commensurate with its regulatory  
78 importance. For instance, oncogenic SRC triggers the ADAM17-dependent release of the  
79 ERBB ligand TGF $\alpha$  (25). It has also become clear that ADAM17 is important in cancers  
80 mediated by mutations in *KRAS*, which are the most frequent oncogenic mutations in human  
81 cancers, particularly in lung, colorectal and pancreatic tumours (26). Although oncogenic  
82 *KRAS* has long been considered to be constitutively active, and thus independent of  
83 upstream signals, a requirement for ADAM17 and ERBB1/EGFR in *KRAS*-induced  
84 pancreatic cancer has challenged this idea (27, 28). Indeed, ERBB signalling has now been  
85 shown to contribute to lung tumorigenesis by supporting activation of oncogenic *KRAS* (29,  
86 30). In this context, it is also significant that *KRAS*-driven tumours express higher levels of  
87 ERBB ligands, in particular amphiregulin and TGF $\alpha$  (27, 29). However, as described above,  
88 ERBB ligands must be proteolytically shed to be active, and the regulation of shedding in  
89 cancer has been largely unknown. A recent advance has been the demonstration of a  
90 requirement for ADAM17 in *KRAS*-induced lung tumorigenesis (31). Using NSCLC and  
91 patient-derived xenografts, as well as the *Kras*<sup>G12D</sup> mouse model, Saad et al. showed that  
92 depletion of ADAM17, or inhibition of its activity, suppressed lung tumour growth. They also  
93 found that oncogenic *KRAS* leads to increased p38 activity, which induces the  
94 phosphorylation of ADAM17, a marker of its activity (3, 12), as well as causing upregulated  
95 shedding of the ADAM17 substrate IL-6R.

96

97 Here, we report that that iRhoms are essential for the oncogenic release of ERBB  
98 ligands by KRAS-G12 mutants. Specifically, KRAS-induced shedding of ERBB ligands is  
99 triggered by the phosphorylation of the cytoplasmic domain of iRhom2, which allows the  
100 recruitment of the phospho-binding proteins 14-3-3. Human cancer-associated mutations in  
101 the cytoplasmic domain of iRhom2 are sufficient to amplify this pathway, thus further  
102 establishing iRhom2 as an important component of oncogenic signalling. The pathological  
103 significance of this pathway was validated upon oncogenic KRAS expression in HEK293T  
104 cells and in non-small-cell lung carcinoma (NSCLC) cell line A549 harbouring an  
105 endogenous oncogenic *KRAS*<sup>G12S</sup> mutation. Furthermore, loss of iRhom activity completely  
106 suppressed KRAS-driven tumour xenograft growth, demonstrating the requirement of  
107 iRhoms in a widely used model of lung cancer. Finally, we report that the cytoplasmic  
108 domain of iRhom2 is a hub for an ERBB-dependent positive feedback loop that maintains  
109 KRAS activity in lung cancer cells. Overall, our results demonstrate that iRhom2 plays a  
110 central role in oncogenic KRAS-induced signalling.

111

112

## 113 **Results**

114

### 115 **iRhoms are required for KRAS-driven shedding of ERBB ligands by ADAM17**

116

117 Oncogenic KRAS induces the activation of ADAM17 (27, 31, 32), so we questioned whether  
118 iRhoms play a role in this process. First, to establish the effect of oncogenic KRAS in  
119 HEK293T cells, we expressed *KRAS*<sup>G12V</sup>. As expected, we observed a significant increase in  
120 the release of the ADAM17 substrate TGF $\alpha$  (Fig. 1A) especially compared to the effect of  
121 *KRAS*<sup>S17N</sup> (Fig. 1A), a mutant with reduced GTPase activity (33, 34). Using the inhibitors  
122 GI254023X and GW280264X, which respectively inhibit ADAM10, or ADAM10 and ADAM17  
123 (35), we confirmed that TGF $\alpha$  shedding by oncogenic KRAS was dependent on ADAM17  
124 (Fig. 1B), which agrees with the reported ability of oncogenic KRAS to increase ADAM17-  
125 dependent shedding (27, 31, 32).

126

127 Although *KRAS*<sup>G12V</sup> is one of the most well studied oncogenic forms of KRAS (36),  
128 several other *KRAS*<sup>G12X</sup> mutations are found in human cancers (37, 38). We found that  
129 *KRAS*<sup>G12S</sup>, *KRAS*<sup>G12C</sup> and *KRAS*<sup>G12D</sup> all caused elevated TGF $\alpha$  release (Fig. 1C). We also  
130 demonstrated that both isoforms of KRAS, 4A and 4B, induce shedding of TGF $\alpha$  (Fig. 1D).  
131 Overall, these results demonstrate the shared ability of KRAS oncogenic mutants to trigger  
132 growth factor release.

133

134 Having shown that oncogenic mutations in KRAS induce ADAM17-dependent  
135 shedding of TGF $\alpha$ , we next asked whether iRhoms are required for this activity. We found  
136 that KRAS-induced shedding of TGF $\alpha$  was completely blocked in HEK293T double-knockout  
137 (DKO) cells mutant for both iRhom1 and iRhom2 (Fig. 1E, S1A). In single knockout lines,  
138 loss of iRhom1 had little effect, whereas iRhom2 KO showed a strong reduction in TGF $\alpha$   
139 shedding (Fig. 1F), thereby demonstrating that iRhom2 is the primary mediator of KRAS-  
140 induced ADAM17-dependent shedding of TGF $\alpha$ .

141

### 142 **KRAS-induced shedding depends on phosphorylation of the cytoplasmic domain of** 143 **iRhom2 by the Raf/MEK/ERK pathway**

144

145 To determine whether, as in inflammatory signalling (13, 14), iRhom2 phosphorylation  
146 participates in oncogenic ADAM17 signalling, we used a mutant version of iRhom2  
147 (iRhom2<sup>site1-3</sup>) in which the three primary phosphorylation sites are changed to alanine (14).  
148 We found that without iRhom2 phosphorylation at these three main sites, shedding of TGF $\alpha$   
149 was significantly reduced (Fig. 2A). Importantly, this phosphorylation-deficient form of  
150 iRhom2 supported ADAM17 maturation as efficiently as iRhom2<sup>WT</sup> (Fig. S2A), which aligns  
151 with our previous findings that  
152 iRhom2 phosphorylation is not needed for ADAM17 maturation (14). These results reveal  
153 the role of iRhom2 phosphorylation in oncogenic signalling by KRAS.

154

155 In inflammatory signalling, iRhom2 phosphorylation is MAP kinase dependent (13, 14);  
156 it is also well established that oncogenic KRAS mutations act through the Raf/MEK/ERK  
157 MAP kinase pathway (36, 39). We therefore asked whether the RAS/MAPK cascade also  
158 participates in iRhom2-dependent oncogenic signalling. TGF $\alpha$  shedding induced by  
159 KRAS<sup>G12V</sup> was strongly inhibited by treating the cells with U1026 (Fig. 2B), a specific inhibitor  
160 of MEK1/2 (40), the kinases upstream of ERK1/2. We also found that oncogenic KRAS  
161 triggers the recruitment of 14-3-3 epsilon to iRhom2 and that, consistent with 14-3-3 proteins  
162 binding to phosphorylated residues (41), this recruitment was inhibited by treatment with  
163 U1026 (Fig. 2C). 14-3-3 recruitment to iRhom2 was associated with decreased binding  
164 between iRhom2 and ADAM17 (Fig. 2C). Although we have not investigated this  
165 phenomenon further it agrees with our previous work on inflammatory signalling (14) and  
166 suggests that the activation of ADAM17 by phosphorylated iRhom2 depends on an altered  
167 interaction between them. Since the recruitment of 14-3-3 to iRhom2 is sufficient for  
168 ADAM17 activation (13, 14), these results demonstrate that KRAS-induced shedding of  
169 ERBB ligands is mediated by ERK1/2-dependent phosphorylation of iRhom2.

170

171 ERK1/2 activation is not only induced by oncogenic KRAS but also by several other  
172 oncogenes (42-44), so we asked whether these other ERK1/2 activating oncogenes can  
173 similarly drive ADAM17 activity. HRAS<sup>G12V</sup>, BRAF<sup>V600E</sup> and SRC<sup>Y530F</sup>, all of which activated  
174 ERK1/2 (Fig. S2B), also induced elevated release of TGF $\alpha$  from HEK293T cells (Fig. 2D).  
175 This result is consistent with an increase in TGF $\alpha$  release by oncogenic SRC (25). ERK-  
176 activating oncogenes KRAS<sup>G12V</sup> and BRAF<sup>V600E</sup> also triggered the release of amphiregulin  
177 (Fig. S2C), another ADAM17-dependent ERBB ligand with a well-established role in  
178 oncogenesis (45, 46). This contrasted with no increase of pERK levels (Fig. S2B) (47, 48)  
179 and little effect on amphiregulin release (Fig. S2C) caused by the oncogene AKT<sup>E17K</sup>. These  
180 results suggest that the ability of ERK1/2-activating oncogenes to trigger the release of  
181 ERBB ligands depends on a common mechanism driven by phosphorylated iRhom2.

182

183

#### 184 **Cancer-associated mutations in iRhom2 potentiate KRAS-induced shedding of ERBB** 185 **ligands**

186

187 Our data demonstrate that iRhom2 phosphorylation participates in oncogenic signalling. The  
188 strongest and most direct evidence for the involvement of iRhom2 in human cancer is in the  
189 case of a rare inherited syndrome called tylosis with oesophageal cancer (TOC), which is  
190 caused by mutations in a small and highly conserved region within the cytoplasmic N-  
191 terminal domain of iRhom2 (Fig. 3A) (8). TOC is characterised by hyperkeratosis,  
192 oesophageal cancer, and at least in the case of one of the familial mutations, iRhom2<sup>D188N</sup>,  
193 by a susceptibility to other cancers (22). We therefore investigated whether the tylotic  
194 mutations affect oncogenic signalling through ADAM17. Replacing wild-type iRhom2 with  
195 tylotic iRhom2<sup>D188N</sup> caused a strong enhancement of KRAS-induced shedding of the  
196 ADAM17 substrate and ERBB ligand amphiregulin (Fig. 3B). The shedding of EGF, which is  
197 triggered by ADAM10 rather than ADAM17 (49), is not affected by iRhom2<sup>D188N</sup> (Fig. 3B),  
198 demonstrating the specificity of the oncogenic iRhom2 mutation for ADAM17. Strikingly, all  
199 analysed TOC mutations, including when combined, amplified KRAS-induced amphiregulin  
200 release (Fig. 3C); none affected EGF shedding (Fig. S3B). Furthermore, none of the tylotic  
201 mutations altered ADAM17 maturation (Fig. S3A), consistent with our previous conclusion  
202 that the cytoplasmic tail of iRhom2 does not participate in the earlier iRhom2 function of  
203 promoting ER to Golgi trafficking of ADAM17 (14). We conclude that TOC mutations are  
204 sufficient to potentiate KRAS-induced shedding of ADAM17 substrates in HEK293T cells,  
205 thereby establishing the direct effect of mutations in N-terminus of iRhom2 in oncogene-  
206 driven signalling.

207

## 208 **iRhoms are required for KRAS-driven tumorigenesis**

209

210 Increased activation of ERBB1/EGFR as well as of the other ERBB receptors have  
211 widespread involvement in cancers (1, 50, 51) including, it has recently been established, in  
212 KRAS-induced lung tumorigenesis (29, 30). We therefore addressed the potential role of  
213 iRhoms in A549 cells, a widely used human lung adenocarcinoma cell model. These cells  
214 were selected because they are homozygous for *KRAS*<sup>G12S</sup>, one of the mutations that we  
215 have shown to drive TGF $\alpha$  release (Fig 1C). Using CRISPR/Cas9, we knocked out both  
216 *iRhom1* and *iRhom2* in A549 cells to create a A549-DKO cell line, lacking all iRhom activity  
217 (Fig. S4A). Consistent with our data from HEK293T cells, loss of iRhoms abolished all  
218 shedding of the endogenous ERBB ligand amphiregulin (Fig. 4A), demonstrating that  
219 iRhoms promote growth factor signalling in a lung cancer cell line. In support of this  
220 conclusion, DKO cells also showed a decrease in cell proliferation (Fig. S4B).

221

222 We next assayed the requirement for iRhoms in the growth of A549 spheroids, 3-  
223 dimensional models of solid tumours (52, 53). Supporting the significance of the standard 2D  
224 cell culture result (Fig. S4B), loss of iRhom1 and iRhom2 also significantly inhibited spheroid  
225 growth (Fig. 4B). Consistent with the implication that iRhom-induced release of ERBB  
226 ligands contributes to spheroid growth, inhibition of ADAM17 but not ADAM10 also inhibited  
227 growth (Fig. 4C, S4C).

228

229 These results prompted us to ask whether iRhoms also participate in tumorigenesis *in*  
230 *vivo*, using a xenograft model in which A549 cells are injected into immunodeficient mice.  
231 This xenograft model allows preclinical evaluation of the role of candidate target genes in  
232 tumour formation and maintenance (54). We established xenografts of A549 parental cells  
233 and A549-DKO cells, and found that loss of iRhoms had a profound effect, preventing all  
234 detectable tumour growth (Fig. 4D). We conclude that in three models of lung cancer, A549  
235 cells in 2D cell culture, 3D spheroid growth, and tumour xenografts, iRhoms are required for  
236 oncogenic signalling and tumour growth.

237

## 238 **iRhom2 phosphorylation regulates ADAM17-dependent release of ERBB ligand and** 239 **tumour spheroid growth in lung cancer cells**

240

241 Having established that iRhoms are required in lung tumorigenesis models, we addressed  
242 the molecular mechanism that underlies the pro-tumorigenic function of iRhom2 in A549  
243 cells, using our earlier work in HEK293T cells as a guide. First, we made a phosphomutant  
244 version of iRhom2 in which the important phosphorylation sites were mutated to alanine

245 (iRhom2<sup>pMUT</sup>); these changes significantly inhibited the release from A549 cells of  
246 endogenous amphiregulin (Fig. 5A, B). Second, ERK1/2 kinases drive this mechanism, as  
247 the inhibitor U1026 blocked this release (Fig. S5A). Third, phosphorylation of iRhom2 is  
248 required for 14-3-3 binding in A549 cells (Fig. 5C), indicating that the phosphorylated  
249 iRhom2/14-3-3/ADAM17 activation pathway controls shedding of the ERBB ligands in these  
250 lung cancer cells. Together with our results in HEK293T cells, these results support the  
251 conclusion that oncogenic KRAS drives ERBB signalling by inducing iRhom2  
252 phosphorylation. As ERBB signalling has recently been shown to contribute to lung  
253 tumorigenesis, including in A549 xenograft tumours (29, 30), our results highlight the pro-  
254 tumorigenic role of iRhom2-dependent shedding of ERBB ligands in lung cancer cells. We  
255 directly tested this conclusion using the spheroid assay, which showed that spheroid growth  
256 of A549-DKO cells was significantly reduced in iRhom2<sup>pMUT</sup> expressing cells, compared to  
257 cells expressing iRhom2<sup>WT</sup> (Fig. 5D).

258

### 259 **Cancer-associated mutations in iRhom2 increase RAS activity and drive a positive** 260 **feedback loop in lung cancer cells**

261

262 In HEK293T cells the cancer causing tylotic iRhom2 mutant D188N enhanced amphiregulin  
263 release by oncogenic KRAS mutations (Fig. 3). The same experiment in A549 cells  
264 confirmed this result in the lung cancer cell line: compared to iRhom2<sup>WT</sup>, expressing  
265 iRhom2<sup>D188N</sup> in A549-DKO cells caused a more than two-fold increase in the release of  
266 endogenous amphiregulin in the presence of oncogenic KRAS (Fig. 6A, B), indicating that  
267 tylotic mutation sensitises iRhom2 to oncogenic signalling. Strikingly, iRhom2<sup>D188N</sup> also  
268 further increased spheroid growth compared to iRhom2<sup>WT</sup> (Fig. 6C), demonstrating that even  
269 in transformed A549 cells, the elevated release of ERBB ligand caused by the tylotic iRhom2  
270 mutation was sufficient to further promote tumour-like growth. To emphasise the implication  
271 of this result, it demonstrates that a single point mutation in the N-terminus of iRhom2 is  
272 sufficient to increase the tumorigenic growth of lung cancer cells.

273

274 Our observation that iRhoms, and in particular tylotic iRhom2<sup>D188N</sup>, induce ERBB  
275 signalling, suggests the existence of a tumorigenic positive feedback loop: oncogenic KRAS,  
276 signalling through iRhom2, ADAM17 and amphiregulin, promotes ERBB activity and  
277 ultimately further KRAS activity. This possibility builds on recent results that show that  
278 oncogenic KRAS mutations are not fully constitutive: using an allele-specific inhibitor it was  
279 shown that the activity of KRAS mutant is modulated by upstream ERBB signalling (55, 56).  
280 To test this hypothesis, we assayed the activity of oncogenic KRAS in A549 cells by using  
281 the RAS-binding domain of Raf1 to pulldown active RAS<sup>GTP</sup>. Compared to parental cells,



282 RAS<sup>GTP</sup> was as reduced by the absence of iRhoms in A549-DKO as upon the treatment with  
283 the pan-ERBB inhibitor afatinib (Fig. 6D, S6A), thus suggesting that iRhoms are required to  
284 maintain RAS activity by activating ERBB signalling. As tylotic iRhom2<sup>D188N</sup> triggers a strong  
285 increase in RAS<sup>GTP</sup> (Fig. 6E, S6B), it further establishes the central role of iRhoms in  
286 controlling RAS activity. To definitively conclude whether this feedback loop acts through  
287 iRhom2-dependent shedding in the extracellular medium, we assessed the effect of  
288 conditioned medium from A549 cells on the ERBB1/EGFR reporter cell line A431.  
289 Conditioned medium from tylotic iRhom2<sup>D188N</sup> caused elevated activated ERK1/2 compared  
290 to iRhom2<sup>WT</sup> (Fig. 6F, S6C). We confirmed that iRhom2-driven activation of the  
291 Raf/MEK/ERK pathway depends on ERBB signalling by using afatinib (Fig. 6F, S6C).  
292 Together, these results support that iRhom-dependent shedding of ERBB ligands in the  
293 extracellular medium drives a positive feedback loop to maintain the activity of oncogenic  
294 KRAS in lung cancer cells.

295

296

## 297 **Discussion**

298

299 We have discovered that, by regulating ADAM17-dependent release of ERBB ligands,  
300 iRhoms are required for KRAS-driven tumorigenesis. Oncogenic mutants of KRAS induce  
301 ERK1/2-dependent phosphorylation of the cytoplasmic domain of iRhom2, triggering the  
302 recruitment of the phospho-binding proteins 14-3-3, which in turn activate ADAM17 to shed  
303 ERBB ligands from the plasma membrane (Fig. 7) The relevance of this mechanism to  
304 human disease is demonstrated by our discovery that mutations in the cytoplasmic domain  
305 of iRhom2, known to be causative of the human cancer syndrome TOC, are sufficient to  
306 amplify this signalling pathway. The significance of iRhom2 to cancer pathogenesis is further  
307 reinforced by the result that loss of iRhom activity from A549 lung cancer cells completely  
308 blocks their ability to form tumours in a xenograft model.

309

310 As well as identifying iRhom2 as an essential player in KRAS-induced tumorigenesis,  
311 these results reveal the existence of a previously unidentified positive feedback loop that  
312 maintains RAS activity in lung cancer cells. In agreement with biochemical evidence proving  
313 that, contrary to prior belief, activated KRAS mutations are 'hyperexcitable' rather than  
314 constitutively locked in an active state (55, 56), two recent studies have shown that  
315 oncogenic KRAS relies on upstream ERBB signalling to remain active, and thus to drive lung  
316 tumorigenesis (29, 30). Our data establish that the cytoplasmic domain of iRhom2 is crucial  
317 in this mechanism: by being both downstream of oncogenic KRAS, and sufficient to increase  
318 ERBB-dependent RAS activation, the cytoplasmic domain of iRhom2 represents a central

319 component of this newly uncovered positive feedback loop (Fig. 7). The existence of this  
320 feedback mechanism presupposes a sufficient pool of immature, plasma membrane-bound  
321 ERBB ligands that can be released in response to elevated iRhom2/ADAM17 activity to  
322 reinforce oncogenic KRAS activity. This requirement is supported by the recent observation  
323 that the expression of amphiregulin (and other ERBB ligands) is indeed elevated in KRAS-  
324 induced lung tumours (29) . Overall, our results strengthen a now compelling body of  
325 evidence that overturns the earlier belief that oncogenic KRAS mutations are fully  
326 constitutive: instead, it is clear that KRAS-driven tumours are driven by signalling input to the  
327 activated KRAS oncoprotein. This opens a new potential strategy for therapeutic  
328 intervention.

329

330 Our results demonstrate that oncogenic and inflammatory signalling pathways share  
331 a conserved mechanism for the activation of the iRhom2/ADAM17 complex (this study and  
332 (13, 14)). One molecular aspect of the activation of ADAM17 by iRhom2 that we previously  
333 reported was that phosphorylation and 14-3-3 binding to iRhom2 causes some kind of  
334 conformational change in the complex between the two proteins, detected by weaker binding  
335 between them (14). This partial uncoupling also occurred during KRAS-induced shedding  
336 (Fig. 2C), thus further demonstrating the conserved activation of the iRhom2/ADAM17  
337 complex. Finally, the growing number of functional signalling complexes in which iRhom2  
338 participates – iRhom2 and ADAM17 (13, 14, 57, 58), iRhom2 and KRAS (Fig. 2C, (59)), and  
339 iRhom2 and the previously described binding partner FRMD8 (60, 61) – strengthen the  
340 incentives to adopt mechanistic and structural approaches to understanding how iRhom2  
341 controls ADAM17 signalling.

342

343 In work that complements these results, Saad et al. reported that phosphorylation of  
344 ADAM17 is also important in KRAS-induced lung tumorigenesis (31). They demonstrated  
345 that oncogenic KRAS induces the phosphorylation of ADAM17, leading to the shedding of  
346 soluble IL-6R and an increase of ERK1/2 activation. Together with our work demonstrating a  
347 pathway dependent on phosphorylation of iRhom2 that leads to shedding of ERBB ligands,  
348 this establishes the wider significance of MAPK-induced shedding by ADAM17 as a mediator  
349 of oncogenic KRAS signalling. It will be interesting to explore the differences and possible  
350 crosstalk between the systems that lead, on one hand to shedding of soluble IL-6R triggered  
351 by phosphorylated ADAM17, and on the other, to ERBB ligand shedding induced by  
352 phosphorylated iRhom2.

353

354 Oncogenic KRAS is a driver of multiple cancers in addition to lung adenocarcinoma,  
355 so our work raises the question of whether iRhom2 also has a role in these other cancers.

356 Pancreatic adenocarcinoma, the seventh leading cause of cancer-related deaths worldwide,  
357 is considered the most KRAS-addicted cancer (62-64). Strikingly, ADAM17 and  
358 ERBB1/EGFR are both required to maintain high RAS activity in a *Kras*<sup>G12D</sup> mouse model of  
359 pancreatic ductal carcinoma (27, 28). In the light of the results we report here, it will be  
360 interesting to investigate whether iRhom2 plays a similar role in supporting a positive  
361 feedback loop in this particularly aggressive oncogenic context. In support of this possibility,  
362 the cytoplasmic domain of iRhom2 has been found to be phosphorylated in the presence of  
363 KRAS<sup>G12D</sup> in pancreatic cancer cells (65). Another case where there is now a strong  
364 incentive to explore the possible involvement of iRhom2 is colorectal cancer, the second  
365 leading cause of cancer-related deaths worldwide (62, 66), which can also be driven by  
366 oncogenic KRAS mutations (67). Using patient-derived organoids and xenografts it has  
367 recently been demonstrated that ERBB signalling promotes tumorigenesis by maintaining  
368 ERK activity in colorectal tumours (68). Although ADAM17 has been shown to be required  
369 for colorectal tumour growth (10), the possible contribution of iRhom2 phosphorylation in  
370 colorectal tumorigenesis is currently unexplored.

371

372 In summary, we have shown that by driving ADAM17-dependent ERBB signalling,  
373 iRhoms are essential components in KRAS-driven tumorigenesis. On a mechanistic level,  
374 we report the existence of a KRAS-iRhom2-ERBB positive feedback loop that maintains  
375 oncogenic KRAS activity and may explain the potency of KRAS-induced cancers. Finally, by  
376 establishing the role of iRhom2 in oncogenic activation of ADAM17, our results provide new  
377 routes to explore future therapeutic opportunities.

378

379

380

381 **Material and Methods**

382

383 **Molecular cloning**

384 iRhom2, KRAS4A, KRAS4B SRC, BRAF and AKT1 constructs were amplified by PCR from  
 385 *iRhom2* cDNA (60), *KRAS4A* cDNA (69), *KRAS4B* cDNA (kind gift from Julian Downward  
 386 (Francis Crick Institute, London)), *SRC* cDNA (antibodies-online), *BRAF* cDNA (antibodies-  
 387 online) and *AKT1* cDNA (antibodies-online). They were mutated using QuikChange Multi  
 388 Site-Directed Mutagenesis Kit (Agilent Technologies, 200515) and subcloned using In-  
 389 Fusion HD Cloning Kit (Takara Bio, 639649) according to the manufacturer's instructions.  
 390 For all constructs, single colonies were picked and extracted DNA was verified by Sanger  
 391 sequencing (Source Bioscience, Oxford, UK).

392

393 **List of plasmids**

| Designation                                                                                                                                           | Source or reference   |
|-------------------------------------------------------------------------------------------------------------------------------------------------------|-----------------------|
| pSpCas9n(BB)2A-Puro V2.0 (pX462 V2.0)                                                                                                                 | (70)                  |
| pHRSIN.pSFFV.blast-mouse iRhom2 <sup>WT</sup> -3xHA                                                                                                   | This paper            |
| pHRSIN.pSFFV.blast-mouse iRhom2-S58A-S60A-S83A-S85A-S87A-S357A-S359A-S360A-T361A (iRhom2 <sup>site1-3</sup> )-3xHA                                    | This paper            |
| pHRSIN.pSFFV.blast-human iRhom2 <sup>WT</sup> -3xHA                                                                                                   | This paper            |
| pHRSIN.pSFFV.blast-human iRhom2 <sup>D188N</sup> -3xHA                                                                                                | This paper            |
| pHRSIN.pSFFV.blast-human iRhom2-S88A-S90A-S113A-S115A-S117A-S129A-S177A-Y229A-S323A-S325A-S328A-S385A-S387A-S388A-T389A(iRhom2 <sup>PMUT</sup> )-3xHA | This paper            |
| pLEX.puro-human iRhom2 <sup>WT</sup> -3xHA                                                                                                            | (60)                  |
| lentiviral packaging plasmid                                                                                                                          | (57)                  |
| lentiviral envelope plasmid                                                                                                                           | (57)                  |
| pEGFP-N1-EGFP (GFP)                                                                                                                                   | Freeman lab           |
| pEGFP-GFP-KRAS4 <sup>G12V</sup>                                                                                                                       | (69)                  |
| pEGFP-GFP-KRAS4 <sup>S17N</sup>                                                                                                                       | This paper            |
| pEGFP-GFP-KRAS4 <sup>G12S</sup>                                                                                                                       | This paper            |
| pEGFP-GFP-KRAS4 <sup>G12C</sup>                                                                                                                       | This paper            |
| pEGFP-GFP-KRAS4 <sup>G12D</sup>                                                                                                                       | This paper            |
| pEGFP-GFP-KRAS4 <sup>G12V</sup>                                                                                                                       | This paper            |
| pEGFP-GFP-SRC <sup>Y530F</sup>                                                                                                                        | This paper            |
| pEGFP-GFP-BRAF <sup>V600E</sup>                                                                                                                       | This paper            |
| pEGFP-GFP-HRAS <sup>G12V</sup>                                                                                                                        | (69)                  |
| pEGFP-AKT1 <sup>E17K</sup>                                                                                                                            | This paper            |
| pLVX-TetOne-zeo                                                                                                                                       | Michael van de Weijer |
| pLVX-TetOne-zeo-human iRhom2 <sup>WT</sup> -SNAP                                                                                                      | This paper            |
| pLVX-TetOne-zeo-human iRhom2 <sup>I186T</sup> -SNAP                                                                                                   | This paper            |
| pLVX-TetOne-zeo-human iRhom2 <sup>D188Y</sup> -SNAP                                                                                                   | This paper            |
| pLVX-TetOne-zeo-human iRhom2 <sup>D188N</sup> -SNAP                                                                                                   | This paper            |
| pLVX-TetOne-zeo-human iRhom2 <sup>P189L</sup> -SNAP                                                                                                   | This paper            |
| pLVX-TetOne-zeo-human iRhom2 <sup>I186T,D188Y,P189L</sup> -SNAP                                                                                       | This paper            |
| pLVX-TetOne-zeo-human iRhom2 <sup>I186T,D188N,P189L</sup> -SNAP                                                                                       | This paper            |

394

395 **Cell culture and DNA Transfection**

396 Human embryonic kidney (HEK) 293T cells and human non-small-cell lung cancer (NSCLC)  
 397 A549 cells were cultured in DMEM (Sigma-Aldrich) supplemented with 10% fetal bovine  
 398 serum (FBS) (Sigma-Aldrich) and 2 mM L-Glutamine (Gibco) at 37°C with 5% CO<sub>2</sub>. Human  
 399 carcinoma A431 cells were cultured in EMEM (Lonza) supplemented with 10% FBS and 2  
 400 mM L-Glutamine (Gibco). FuGENE HD (Promega) was used for transient DNA transfection  
 401 in HEK293T cells, with a ratio of 1 µg DNA and 4 µl transfection reagent diluted in OptiMEM  
 402 (Gibco). Lipofectamine 2000 (Thermo Fisher Scientific) was used for transient DNA  
 403 transfection of A549 cells, with a ratio of 0.3 µg DNA and 1 µl transfection reagent. HEK  
 404 DKO stably expressing pLVX-TetOne-zeo constructs were stimulated with 100 ng/ml  
 405 doxycycline (MP Biomedicals, 195044).

406  
 407 **CRISPR/Cas9 genome editing in A549 and HEK293T cells**

408 CRISPR/Cas9-mediated single knockout of human *RHBDF1/iRhom1* or *RHBDF2/iRhom2* in  
 409 HEK293T was performed as described before (60). In brief, the plasmids co-expressing  
 410 Cas9 nickase (Cas9n) and the gRNA targeting *RHBDF1* or *RHBDF2* were transfected into  
 411 HEK293T cells. Upon puromycin selection and isolation of single colonies, the loss of  
 412 *RHBDF1* or *RHBDF2* was analysed by PCR.

413 For CRISPR/Cas9-mediated double knockout of human *RHBDF1/iRhom1* and  
 414 *RHBDF2/iRhom2* in A549 cells, 4 µg of plasmids co-expressing Cas9n and the gRNA were  
 415 transfected using the Neon Transfection System (Invitrogen) according to the manufacturers'  
 416 instructions. The following electroporation settings were used: 1,230 volts, 30 seconds pulse  
 417 width, 2 pulses number and 8 x 10<sup>6</sup> cells/ml. Antibiotic selection was performed using 0.5  
 418 µg/ml puromycin for 48 hrs, before selecting single colonies to establish clonal cell lines, and  
 419 analysing loss of *RHBDF1* and *RHBDF2* by PCR.

420  
 421 **List of primers**

| Designation                                                                   | Reference | Additional information                              |
|-------------------------------------------------------------------------------|-----------|-----------------------------------------------------|
| gRNA targeting exon 3 of human<br><i>RHBDF1</i><br>(GGAACCATGAGTGAGGCCCC)     | (60)      | gRNA targeting<br>exon 3<br>of human <i>RHBDF1</i>  |
| gRNA targeting exon 3 of human<br><i>RHBDF1</i><br>(GGGTGGCTTCTTGCGCTGCC)     | (60)      | gRNA targeting<br>exon 3<br>of human <i>RHBDF1</i>  |
| gRNA targeting exon 10 of human<br><i>RHBDF1</i><br>(AGCCGTGTGCATCTATGGCC)    | (60)      | gRNA targeting<br>exon 10<br>of human <i>RHBDF1</i> |
| gRNA targeting exon 10 of human<br><i>RHBDF1</i><br>(CCGTCTCATGCTGCGAGAAC)    | (60)      | gRNA targeting<br>exon 10<br>of human <i>RHBDF1</i> |
| gRNA targeting exon 2 of human<br><i>RHBDF2</i><br>(GCAGAGCCGGAAGCCACCCC)     | (60)      | gRNA targeting<br>exon 2<br>of human <i>RHBDF2</i>  |
| gRNA targeting exon 2 of human<br><i>RHBDF2</i><br>(GGGTCTCTTTCTCGGGTGGC)     | (60)      | gRNA targeting<br>exon 2<br>of human <i>RHBDF2</i>  |
| gRNA targeting exon 9 of human<br><i>RHBDF2</i><br>(AAACTCGTCCATGTCATCATCACC) | (60)      | gRNA targeting<br>exon 9<br>of human <i>RHBDF2</i>  |
| gRNA targeting exon 9 of human<br><i>RHBDF2</i><br>(ACGGGTGCGATGCCATACGC)     | (60)      | gRNA targeting<br>exon 9<br>of human <i>RHBDF2</i>  |

422

423 **Lentiviral transduction of cell lines**

424 A549 or HEK293T DKO cells stably expressing iRhom2 constructs were generated by  
 425 lentiviral transduction using the pLVX-TetOne or pHRSIN constructs as previously described  
 426 (57). Cells were selected by adding 50 µg/ml zeocin or 10 µg/ml Blasticidin S HCl.

427

428 **List of cell lines**

| Designation                                                                 | Source or reference | Additional information                                                                                                                                                           |
|-----------------------------------------------------------------------------|---------------------|----------------------------------------------------------------------------------------------------------------------------------------------------------------------------------|
| HEK293T cells                                                               | Freeman lab         |                                                                                                                                                                                  |
| HEK293T iRhom1/iRhom2 double-knockout (DKO)                                 | (60)                | CRISPR/Cas9-mediated KO cell line                                                                                                                                                |
| HEK293T iRhom1/iRhom2 DKO + iRhom2 <sup>WT</sup>                            | (60)                | HEK293T DKO cells transduced with pLEX.puro-human iRhom2 <sup>WT</sup> -3xHA                                                                                                     |
| HEK293T iRhom1 knockout                                                     | This paper          | CRISPR/Cas9-mediated KO cell line                                                                                                                                                |
| HEK293T iRhom2 knockout                                                     | This paper          | CRISPR/Cas9-mediated KO cell line                                                                                                                                                |
| HEK293T iRhom1/iRhom2 DKO + iRhom2 <sup>WT</sup>                            | This paper          | HEK293T DKO cells transduced with pHRSIN.pSFFV.blast-mouse iRhom2 <sup>WT</sup> -3xHA, used as control for HEK-DKO-iRhom2 <sup>site1-3</sup>                                     |
| HEK293T iRhom1/iRhom2 DKO + iRhom2 <sup>site1-3</sup>                       | This paper          | HEK293T DKO cells transduced with pHRSIN.pSFFV.blast-mouse iRhom2 <sup>site1-3</sup> -3xHA                                                                                       |
| HEK293T iRhom1/iRhom2 DKO + iRhom2 <sup>WT</sup> (inducible)                | This paper          | HEK293T DKO cells transduced with pLVX-TetOne-zeo-human iRhom2 <sup>WT</sup> -SNAP, used as control for HEK DKO expressing iRhom2 TOC constructs                                 |
| HEK293T iRhom1/iRhom2 DKO + iRhom2 <sup>D186T</sup> (inducible)             | This paper          | HEK293T DKO cells transduced with pLVX-TetOne-zeo-human iRhom2 <sup>D186T</sup> -SNAP                                                                                            |
| HEK293T iRhom1/iRhom2 DKO + iRhom2 <sup>D188Y</sup> (inducible)             | This paper          | HEK293T DKO cells transduced with pLVX-TetOne-zeo-human iRhom2 <sup>D188Y</sup> -SNAP                                                                                            |
| HEK293T iRhom1/iRhom2 DKO + iRhom2 <sup>D188N</sup> (inducible)             | This paper          | HEK293T DKO cells transduced with pLVX-TetOne-zeo-human iRhom2 <sup>D188N</sup> -SNAP                                                                                            |
| HEK293T iRhom1/iRhom2 DKO + iRhom2 <sup>P189L</sup> (inducible)             | This paper          | HEK293T DKO cells transduced with pLVX-TetOne-zeo-human iRhom2 <sup>P189L</sup> -SNAP                                                                                            |
| HEK293T iRhom1/iRhom2 DKO + iRhom2 <sup>I186T,D188Y,P189L</sup> (inducible) | This paper          | HEK293T DKO cells transduced with pLVX-TetOne-zeo-human iRhom2 <sup>I186T,D188Y,P189L</sup> -SNAP                                                                                |
| HEK293T iRhom1/iRhom2 DKO + iRhom2 <sup>I186T,D188N,P189L</sup> (inducible) | This paper          | HEK293T DKO cells transduced with pLVX-TetOne-zeo-human iRhom2 <sup>I186T,D188N,P189L</sup> -SNAP                                                                                |
| A549 cells                                                                  | (71)                |                                                                                                                                                                                  |
| A549 iRhom1/iRhom2 DKO                                                      | This paper          | CRISPR/Cas9-mediated KO cell line                                                                                                                                                |
| A549 iRhom1/iRhom2 DKO + iRhom2 <sup>WT</sup>                               | This paper          | A549 DKO cells transduced at high multiplicity of infection (MOI) with pHRSIN.pSFFV.blast-human iRhom2 <sup>WT</sup> -3xHA, used as control for A549-DKO-iRhom2 <sup>D188N</sup> |

|                                                  |             |                                                                                                                                                    |
|--------------------------------------------------|-------------|----------------------------------------------------------------------------------------------------------------------------------------------------|
| A549 iRhom1/iRhom2 DKO + iRhom2 <sup>D188N</sup> | This paper  | A549 DKO cells transduced with pHRSIN.pSFFV.blast-human iRhom2 <sup>D188N</sup> -3xHA                                                              |
| A549 iRhom1/iRhom2 DKO + iRhom2 <sup>WT</sup>    | This paper  | A549 DKO cells transduced at low MOI with pHRSIN.pSFFV.blast-human iRhom2 <sup>WT</sup> -3xHA, used as control for A549-DKO-iRhom2 <sup>pMUT</sup> |
| A549 iRhom1/iRhom2 DKO + iRhom2 <sup>pMUT</sup>  | This paper  | A549 DKO cells transduced with pHRSIN.pSFFV.blast-human iRhom2 <sup>pMUT</sup> -3xHA                                                               |
| A431 cells                                       | Freeman lab |                                                                                                                                                    |

429

430

### Co-immunoprecipitation

431 Cells were washed three times with ice-cold PBS before lysis in Triton X-100 lysis buffer (1%  
 432 Triton X-100, 150 mM NaCl, 50 mM Tris-HCl (pH 7.5)) supplemented with EDTA-free  
 433 complete protease inhibitor mix (Roche, 11873580001) and 10 mM 1,10-phenanthroline  
 434 (Sigma-Aldrich, 131377-5G). Pre-washed anti-HA magnetic beads (Thermo Scientific,  
 435 88837) were added to the lysates cleared from cell debris by centrifugation at 15,000 rpm at  
 436 4°C for 15 min and incubated for at least 2 hr on a rotor at 4°C. Beads were washed five  
 437 times with Triton X-100 lysis buffer and eluted with a 10-minute incubation at 65°C in 2x  
 438 SDS sample buffer (0.25 M TrisHCl pH6.8, 10% SDS, 50% glycerol, 0.02% bromophenol  
 439 blue) supplemented with 200 mM DTT.

440

441

### Concanavalin A enrichment

442 Cell lysates were incubated with 30 µl concanavalin A sepharose (Sigma-Aldrich, C9017-  
 443 25ML) at 4°C for 2 hr on a rotor. Beads were pelleted at 4000 rpm for 2 min at 4°C and  
 444 washed five times with Triton X-100 lysis buffer. Glycoproteins were eluted with 2x LDS buffer  
 445 (Invitrogen) supplemented with 25% sucrose and 50 mM DTT for 10 min at 65°C.

446

447

### RAS-GTP pulldown

448 To detect active RAS in A549 cells, RAS-GTP pulldown was performed according to the  
 449 manufacturers' instructions using the Active Ras Detection Kit (Cell Signaling Technology,  
 450 #8821). In brief, one confluent 10 cm dish of cells was rinsed with ice-cold PBS and lysed in  
 451 0.5 ml ice-cold lysis buffer supplemented with 1 mM PMSF. Cell lysates were cleared by  
 452 centrifugation and protein concentration was determined by Bradford assay. Cleared lysates  
 453 were added to the pre-washed spin cup which contains 100 µl of the 50% resin slurry and 80  
 454 µg of GST-Raf1-RBD and incubated at 4°C for 1 hr on a rotor. The resin was washed three  
 455 times with Wash Buffer and the proteins bound to the resin were eluted with 50 µl of the  
 456 sample buffer supplemented with 200 mM DTT. Samples were denatured at 95°C for 5 min  
 457 and were subjected to western blot analysis.

458

459

### SDS-PAGE and western blotting

460 Cell lysates were denatured at 65°C for 10 min in sample buffer supplemented with 100 mM  
 461 DTT. Samples were run in 4-12% Bis-Tris NuPAGE gradient gels (Invitrogen) and MOPS  
 462 running buffer (50 mM MOPS, 50 mM Tris, 0.1 % SDS, 1 mM EDTA), or in Novex 8-16%  
 463 Tris-Glycine Mini Gels with WedgeWell format (Thermo Scientific) and Tris-Glycine running  
 464 buffer (25 mM Tris, 192 mM glycine, 0.1% SDS). Proteins were then transferred to a  
 465 methanol activated polyvinylidene difluoride (PVDF) membrane (Millipore) in Bis-Tris or Tris-  
 466 Glycine transfer buffer. 5% milk in PBST (0.1% Tween 20) or TBST (0.05% Tween 20) was  
 467 used for blocking and antibody incubation, and PBST or TBST was used for washing. The  
 468 membranes were incubated with secondary antibodies at the room temperature for 1 hr.  
 469 Blots were quantified using ImageJ.

470

471 **List of antibodies**

| Name                                                            | Source            | Catalogue number | Dilution |
|-----------------------------------------------------------------|-------------------|------------------|----------|
| anti-ADAM17, rabbit polyclonal                                  | Abcam             | ab39162          | 1:2000   |
| anti-beta-actin, mouse monoclonal                               | Santa Cruz        | sc-47778         | 1:2000   |
| anti-14-3-3 epsilon, rabbit polyclonal                          | CST               | 9635             | 1:500    |
| anti-HA-HRP, rat monoclonal (clone 3F10)                        | Roche             | 12013819001      | 1:2000   |
| anti-GFP, chicken polyclonal                                    | Abcam             | ab13970          | 1:4000   |
| anti-phosphoERK1/2 (T202/Y204), rabbit monoclonal (clone 197G2) | CST               | 4377             | 1:500    |
| anti-ERK1/2, rabbit polyclonal                                  | CST               | 9102             | 1:1000   |
| anti-V5, goat polyclonal                                        | Santa Cruz        | sc-83849         | 1:2000   |
| anti-AKT, rabbit polyclonal                                     | CST               | 9272             | 1:1000   |
| anti-pSRC (Y416), rabbit polyclonal                             | CST               | 2101             | 1:1000   |
| anti-pAKT (S473), rabbit polyclonal                             | CST               | 9271             | 1:1000   |
| anti-calreticulin, rabbit polyclonal                            | Invitrogen        | PA3-900          | 1:2000   |
| anti-transferrin receptor1, mouse monoclonal (clone H68.4)      | Invitrogen        | 13-6800          | 1:2000   |
| anti-rabbit-HRP, goat polyclonal                                | CST               | 7074             | 1:2500   |
| anti-goat-HRP, mouse monoclonal                                 | Santa Cruz        | sc2354           | 1:2500   |
| anti-mouse-HRP, horse polyclonal                                | CST               | 7076             | 1:2500   |
| anti-chicken-HRP, goat polyclonal                               | Novus Biologicals | NB7303           | 1:10000  |

472

473 **AP-shedding assay**

474 HEK293T cell lines were seeded in poly-(L)-lysine (PLL, Sigma-Aldrich) coated 24-well  
475 plates in triplicates 24 hours before transfection. 50 ng alkaline phosphatase (AP)-  
476 conjugated substrates were transfected with FuGENE HD (Promega, E2312). In KRAS  
477 related experiments, 100 ng control plasmids or KRAS plasmids were transfected together  
478 with AP-substrates. 24 hrs after transfection, cells were washed twice with PBS and  
479 incubated for 18 hr in 300 µl phenolred-free OptiMEM (Gibco, 11058-021) supplemented  
480 with 1 µM GW280264X (GW) (Generon, AOB3632-5) or GI254023X (GI) (Sigma, SML0789-  
481 5MG) when indicated. For kinase inhibition assay, 300 µl phenolred-free OptiMEM were  
482 supplemented with 10 µM U0126 (abcam, ab120241-5mg) and the supernatant was  
483 collected after 3 hr. The supernatants were then collected, and cells were lysed in 300 µl  
484 Triton X-100 lysis buffer supplemented with EDTA-free protease inhibitor mix (Roche). 100  
485 µl supernatant and 100 µl diluted cell lysates were independently incubated with 100 µl AP  
486 substrate p-nitrophenyl phosphate (PNPP) (Thermo Scientific, 37620) at room temperature  
487 and the absorbance was measured at 405 nm by a plate reader (SpectraMax M3, Molecular  
488 Devices). The percentage of substrate release was calculated by dividing the signal from the  
489 supernatant by the total signal (supernatant and cell lysate).

490

491 **Spheroid assay**

492 Tumour spheroid were generated as previously described in (72). In brief, 2,500 cells were  
493 resuspended in culture medium supplemented with 2.5% growth-factor reduced Matrigel  
494 (Scientific Laboratory Supplies #356231) and placed in a 96-well round-bottom ultra-low  
495 attachment plate (Corning #7007). Formation of the spheroids was initiated by centrifugation  
496 at 1,200 rpm for 4 minutes. After 13 days, tumour spheroids were imaged using a  
497 stereoscopic microscope (Leica DFC310 FX), and cell viability was measured using the



498 CellTiter-Glo Cell viability assay (Promega, #G9681) according to the manufacturer's  
499 instructions.

500

#### 501 **Cell proliferation assay**

502 To assay cell proliferation in a 2D adherent format, 1,000 cells were seeded in standard 96-  
503 well tissue culture plate. After five days, cell viability was measured using the CellTiter-Glo  
504 Cell viability assay (Promega, #G9681) according to the manufacturer's instructions, as  
505 previously described in (56).

506

#### 507 **A431 ERBB1/EGFR activation assay**

508  $1.5 \times 10^6$  A549 or  $3 \times 10^6$  A431 cells were seeded in a 10 cm tissue culture dish. After three  
509 days, A431 cells were washed once with PBS, and serum-starved in 10ml of OptiMEM  
510 supplemented with 1  $\mu$ M afatinib when indicated, and with 2  $\mu$ M GW and to prevent growth  
511 factor release from A431 cells. The following day, the medium of A431 cells was renewed  
512 with OptiMEM supplemented with the same inhibitors, while A549 cells were washed once  
513 with PBS before adding 5 ml OptiMEM constituting the conditioned medium. After four hours  
514 of collection, A431 cells were incubated with the conditioned medium for three minutes  
515 before being placed on ice and lysed as described above.

516

#### 517 **ELISA**

518 80,000 A549 cells were seeded in triplicates per well of a 24-well plate. To study the loss of  
519 shedding in A549-DKO and A549-DKO-iRhom2<sup>pMUT</sup>, the medium was replaced the following  
520 day with 350  $\mu$ l of full medium and collected after 18 hr of incubation. To determine the  
521 increased shedding in A549-DKO-iRhom2<sup>D188N</sup>, a 4-hr collection was performed 48 hr after  
522 seeding the cells. Similarly, a 4-hr collection in 350  $\mu$ l of full medium supplemented with 10  
523  $\mu$ M U0126 was performed to determine the contribution of ERK1/2. In all cases, the  
524 concentration of amphiregulin in the supernatant was determined using the Human  
525 Amphiregulin Quantikine ELISA Kit (R&D Systems, DAR00) according to the manufacturers'  
526 instructions. In parallel, the cells were lysed in Triton X-100 lysis buffer and the total protein  
527 concentration was measured using the BCA Assay (Life Technologies). The substrate  
528 release was determined by normalising the amphiregulin concentration by the total protein  
529 concentration.

530

#### 531 **Xenograft model**

532  $1 \times 10^6$  Ctrl and iRhom1/2 double-knockout (DKO) A549 cells were resuspended in  
533 Matrigel:PBS (50:50 v/v) before being subcutaneously injected in one flank of 12 (n=6 mice  
534 per cell line) 6-week-old female immunodeficient NOD.*Cg-Prkdc<sup>scid</sup>Il2rg<sup>tm1Wjl</sup>/SzJ* (NSG) mice  
535 (Charles River UK Ltd (Margate, Kent)). Xenograft growth was monitored with a calliper  
536 twice weekly; tumour volume was determined using the following formula: (length x  
537 width<sup>2</sup>)/2. At the end of the experiment, tumours were collected and photographed. Animal  
538 experiments were performed under the Home Office Project Licence PPL30/3395 (A.J. Ryan  
539 licence holder).

540

541

#### 542 **Acknowledgments**

543

544 We are indebted to Ervin Fodor (Dunn School, Oxford) for providing A549 cells, and to Sally  
545 Cowley (Dunn School, Oxford) for the help in generating the CRISPR/Cas9 knockout A549  
546 cell lines. We thank the whole Freeman and Ryan groups for contributions during the course  
547 of the project and for feedback on the manuscript. We are thankful to Miriam Molina-Arcas  
548 and Julian Downward (Francis Crick Institute, London) for the exchange of ideas and for  
549 providing the plasmid to express *KRAS4B*, and to Michael van de Weijer (Dunn School,  
550 Oxford) for providing the pLVX-TetOne-zeo plasmid.

551

552 The Freeman group was supported by a Wellcome Trust Investigator Awards  
553 (101035/Z/13/Z and 220887/Z/20/Z). This project was also supported by a Cancer Research  
554 UK Development Fund (CRUKDF 0920-MF). B.S. was funded by the Medical Research  
555 Council scholarship (1643127). F.L. was supported by the China Scholarship Council-  
556 University of Oxford Scholarship (201806240008). A.G.G. received funding from H2020  
557 Marie Skłodowska-Curie Actions fellowship (659166), and A.G.G. and M.F. were funded by  
558 the Biotechnology and Biological Sciences Research Council Research grant 440  
559 (BB/RO16771/1). S.M.S. and A.J.R. were funded by the Medical Research Council  
560 Programm Grant (MC\_UU\_00001/6).

561

562

## 563 Additional information

564

565 The authors declare no competing interests.

566

567

## 568 Author contributions

569

570 B.S., F.L., A.G.G., A.J.R. and M.F. designed research; B.S., F.L. and S.M.S. performed  
571 research; B.S., F.L., S.M.S. and A.G.G. contributed new reagents/analytical tools; B.S., F.L.  
572 and S.M.S. analysed data; B.S., F.L., S.M.S., A.G.G., A.J.R. and M.F. wrote the paper;  
573 A.J.R. and M.F. supervised the project.

574

575

## 576 References

577

- 578 1. Wang Z (2017) ErbB Receptors and Cancer. *Methods in Molecular Biology (Clifton,*  
579 *N.J.)* 1652:3-35.
- 580 2. Sigismund S, Avanzato D, & Lanzetti L (2018) Emerging functions of the EGFR in  
581 cancer. *Mol Oncol* 12(1):3-20.
- 582 3. Düsterhöft S, Babendreyer A, Giese AA, Flashshove C, & Ludwig A (2019) Status  
583 update on iRhom and ADAM17: It's still complicated. *Biochimica et biophysica acta.*  
584 *Molecular cell research* 1866(10):1567-1583.
- 585 4. Dulloo I, Muliylil S, & Freeman M (2019) The molecular, cellular and  
586 pathophysiological roles of iRhom pseudoproteases. *Open Biology* 9(3):190003.
- 587 5. Agwae ME, *et al.* (2020) iRhom2 in the pathogenesis of oral squamous cell  
588 carcinoma. *Mol Biol Rep* 47(5):3987-3992.
- 589 6. Xu Q, *et al.* (2020) Association of iRhom1 and iRhom2 expression with prognosis in  
590 patients with cervical cancer and possible signaling pathways. *Oncol Rep* 43(1):41-  
591 54.
- 592 7. Borrell-Pagès M, Rojo F, Albanell J, Baselga J, & Arribas J (2003) TACE is required  
593 for the activation of the EGFR by TGF- $\alpha$  in tumors. *Embo j* 22(5):1114-1124.
- 594 8. Blaydon DC, *et al.* (2012) RHBDF2 mutations are associated with tylosis, a familial  
595 esophageal cancer syndrome. *Am J Hum Genet* 90(2):340-346.
- 596 9. Kenny PA & Bissell MJ (2007) Targeting TACE-dependent EGFR ligand shedding in  
597 breast cancer. *J Clin Invest* 117(2):337-345.
- 598 10. Schmidt S, *et al.* (2018) ADAM17 is required for EGF-R-induced intestinal tumors via  
599 IL-6 trans-signaling. *J Exp Med* 215(4):1205-1225.
- 600 11. Arteaga CL & Engelman JA (2014) ERBB receptors: from oncogene discovery to  
601 basic science to mechanism-based cancer therapeutics. *Cancer Cell* 25(3):282-303.
- 602 12. Zunke F & Rose-John S (2017) The shedding protease ADAM17: Physiology and  
603 pathophysiology. *Biochimica et biophysica acta. Molecular cell research* 1864(11 Pt  
604 B):2059-2070.

- 605 13. Cavadas M, *et al.* (2017) Phosphorylation of iRhom2 Controls Stimulated Proteolytic  
606 Shedding by the Metalloprotease ADAM17/TACE. *Cell Rep* 21(3):745-757.
- 607 14. Grieve AG, *et al.* (2017) Phosphorylation of iRhom2 at the plasma membrane  
608 controls mammalian TACE-dependent inflammatory and growth factor signalling.  
609 *eLife* 6.
- 610 15. Mochizuki S & Okada Y (2007) ADAMs in cancer cell proliferation and progression.  
611 *Cancer Science* 98(5):621-628.
- 612 16. Walkiewicz K, *et al.* (2016) Expression of Migration-Related Genes in Human  
613 Colorectal Cancer and Activity of a Disintegrin and Metalloproteinase 17. *Biomed*  
614 *Res Int* 2016:8208904.
- 615 17. Zhou B-BS, *et al.* (2006) Targeting ADAM-mediated ligand cleavage to inhibit HER3  
616 and EGFR pathways in non-small cell lung cancer. *Cancer Cell* 10(1):39-50.
- 617 18. Zhou Z, *et al.* (2014) Human rhomboid family-1 suppresses oxygen-independent  
618 degradation of hypoxia-inducible factor-1 $\alpha$  in breast cancer. *Cancer Research*  
619 74(10):2719-2730.
- 620 19. Ellis A, Risk JM, Maruthappu T, & Kelsell DP (2015) Tylosis with oesophageal  
621 cancer: Diagnosis, management and molecular mechanisms. *Orphanet J Rare Dis*  
622 10:126.
- 623 20. Mokoena T, Smit JGM, Karusseit VO, Dorfling CM, & van Rensburg EJ (2018)  
624 Tylosis associated with squamous cell carcinoma of the oesophagus (TOC): Report  
625 of an African family with a novel RHBDF2 variant. *Clinical Genetics* 93(5):1114-1116.
- 626 21. Qu L, *et al.* (2019) Whole Exome Sequencing Identified a Novel Mutation of the  
627 RHBDF2 Gene in a Chinese Family of Tylosis with Esophageal Cancer. *Acta*  
628 *Dermato-Venereologica* 99(7):699-700.
- 629 22. Saarinen S, *et al.* (2012) Analysis of a Finnish family confirms RHBDF2 mutations as  
630 the underlying factor in tylosis with esophageal cancer. *Fam Cancer* 11(3):525-528.
- 631 23. Brooke MA, *et al.* (2014) iRHOM2-dependent regulation of ADAM17 in cutaneous  
632 disease and epidermal barrier function. *Hum Mol Genet* 23(15):4064-4076.
- 633 24. Maney SK, *et al.* (2015) Deletions in the cytoplasmic domain of iRhom1 and iRhom2  
634 promote shedding of the TNF receptor by the protease ADAM17. *Sci Signal*  
635 8(401):ra109.
- 636 25. Maretzky T, Zhou W, Huang XY, & Blobel CP (2011) A transforming Src mutant  
637 increases the bioavailability of EGFR ligands via stimulation of the cell-surface  
638 metalloproteinase ADAM17. *Oncogene* 30(5):611-618.
- 639 26. Khan AQ, *et al.* (2019) RAS-mediated oncogenic signaling pathways in human  
640 malignancies. *Semin Cancer Biol* 54:1-13.
- 641 27. Ardito CM, *et al.* (2012) EGF receptor is required for KRAS-induced pancreatic  
642 tumorigenesis. *Cancer Cell* 22(3):304-317.
- 643 28. Navas C, *et al.* (2012) EGF receptor signaling is essential for k-ras oncogene-driven  
644 pancreatic ductal adenocarcinoma. *Cancer Cell* 22(3):318-330.
- 645 29. Kruspig B, *et al.* (2018) The ERBB network facilitates KRAS-driven lung  
646 tumorigenesis. *Science Translational Medicine* 10(446).
- 647 30. Moll HP, *et al.* (2018) Afatinib restrains K-RAS-driven lung tumorigenesis. *Science*  
648 *Translational Medicine* 10(446).
- 649 31. Saad MI, *et al.* (2019) ADAM17 selectively activates the IL-6 trans-signaling/ERK  
650 MAPK axis in KRAS-addicted lung cancer. *EMBO Mol Med* 11(4).
- 651 32. Van Schaeybroeck S, *et al.* (2011) Oncogenic Kras promotes chemotherapy-induced  
652 growth factor shedding via ADAM17. *Cancer Res* 71(3):1071-1080.
- 653 33. Farnsworth CL & Feig LA (1991) Dominant inhibitory mutations in the Mg(2+)-binding  
654 site of RasH prevent its activation by GTP. *Molecular and Cellular Biology*  
655 11(10):4822-4829.
- 656 34. Feig LA & Cooper GM (1988) Inhibition of NIH 3T3 cell proliferation by a mutant ras  
657 protein with preferential affinity for GDP. *Mol Cell Biol* 8(8):3235-3243.

- 658 35. Hundhausen C, *et al.* (2003) The disintegrin-like metalloproteinase ADAM10 is  
659 involved in constitutive cleavage of CX3CL1 (fractalkine) and regulates CX3CL1-  
660 mediated cell-cell adhesion. *Blood* 102(4):1186-1195.
- 661 36. Muñoz-Maldonado C, Zimmer Y, & Medová M (2019) A Comparative Analysis of  
662 Individual RAS Mutations in Cancer Biology. *Front Oncol* 9:1088.
- 663 37. Hobbs GA, Der CJ, & Rossman KL (2016) RAS isoforms and mutations in cancer at  
664 a glance. *Journal of Cell Science* 129(7):1287-1292.
- 665 38. Timar J & Kashofer K (2020) Molecular epidemiology and diagnostics of KRAS  
666 mutations in human cancer. *Cancer metastasis reviews* 39(4):1029-1038.
- 667 39. Schubert S, Shannon K, & Bollag G (2007) Hyperactive Ras in developmental  
668 disorders and cancer. *Nature Reviews. Cancer* 7(4):295-308.
- 669 40. Favata MF, *et al.* (1998) Identification of a novel inhibitor of mitogen-activated protein  
670 kinase kinase. *J Biol Chem* 273(29):18623-18632.
- 671 41. Fu H, Subramanian RR, & Masters SC (2000) 14-3-3 proteins: structure, function,  
672 and regulation. *Annu Rev Pharmacol Toxicol* 40:617-647.
- 673 42. Liu F, Yang X, Geng M, & Huang M (2018) Targeting ERK, an Achilles' Heel of the  
674 MAPK pathway, in cancer therapy. *Acta pharmaceutica Sinica. B* 8(4):552-562.
- 675 43. Roskoski R (2012) ERK1/2 MAP kinases: structure, function, and regulation.  
676 *Pharmacological Research* 66(2):105-143.
- 677 44. Wee P & Wang Z (2017) Epidermal Growth Factor Receptor Cell Proliferation  
678 Signaling Pathways. *Cancers* 9(5).
- 679 45. Xu Q, Chiao P, & Sun Y (2016) Amphiregulin in Cancer: New Insights for  
680 Translational Medicine. *Trends in Cancer* 2(3):111-113.
- 681 46. Busser B, Sancey L, Brambilla E, Coll JL, & Hurbin A (2011) The multiple roles of  
682 amphiregulin in human cancer. *Biochim Biophys Acta* 1816(2):119-131.
- 683 47. Beaver JA, *et al.* (2013) PIK3CA and AKT1 mutations have distinct effects on  
684 sensitivity to targeted pathway inhibitors in an isogenic luminal breast cancer model  
685 system. *Clinical Cancer Research: An Official Journal of the American Association  
686 for Cancer Research* 19(19):5413-5422.
- 687 48. Lauring J, *et al.* (2010) Knock in of the AKT1 E17K mutation in human breast  
688 epithelial cells does not recapitulate oncogenic PIK3CA mutations. *Oncogene*  
689 29(16):2337-2345.
- 690 49. Sahin U, *et al.* (2004) Distinct roles for ADAM10 and ADAM17 in ectodomain  
691 shedding of six EGFR ligands. *The Journal of Cell Biology* 164(5):769-779.
- 692 50. Hynes NE & MacDonald G (2009) ErbB receptors and signaling pathways in cancer.  
693 *Curr Opin Cell Biol* 21(2):177-184.
- 694 51. Tebbutt N, Pedersen MW, & Johns TG (2013) Targeting the ERBB family in cancer:  
695 couples therapy. *Nat Rev Cancer* 13(9):663-673.
- 696 52. Gilazieva Z, Ponomarev A, Rutland C, Rizvanov A, & Solovyeva V (2020) Promising  
697 Applications of Tumor Spheroids and Organoids for Personalized Medicine. *Cancers  
698 (Basel)* 12(10).
- 699 53. Ham SL, Joshi R, Thakuri PS, & Tavana H (2016) Liquid-based three-dimensional  
700 tumor models for cancer research and drug discovery. *Experimental Biology and  
701 Medicine (Maywood, N.J.)* 241(9):939-954.
- 702 54. Gengenbacher N, Singhal M, & Augustin HG (2017) Preclinical mouse solid tumour  
703 models: status quo, challenges and perspectives. *Nat Rev Cancer* 17(12):751-765.
- 704 55. Lito P, Solomon M, Li LS, Hansen R, & Rosen N (2016) Allele-specific inhibitors  
705 inactivate mutant KRAS G12C by a trapping mechanism. *Science* 351(6273):604-  
706 608.
- 707 56. Patricelli MP, *et al.* (2016) Selective Inhibition of Oncogenic KRAS Output with Small  
708 Molecules Targeting the Inactive State. *Cancer Discovery* 6(3):316-329.
- 709 57. Adrain C, Zettl M, Christova Y, Taylor N, & Freeman M (2012) Tumor necrosis factor  
710 signaling requires iRhom2 to promote trafficking and activation of TACE. *Science*  
711 335(6065):225-228.

- 712 58. McIlwain DR, *et al.* (2012) iRhom2 regulation of TACE controls TNF-mediated  
713 protection against Listeria and responses to LPS. *Science (New York, N.Y.)*  
714 335(6065):229-232.
- 715 59. Go CD, *et al.* (2021) A proximity-dependent biotinylation map of a human cell: an  
716 interactive web resource.796391.
- 717 60. Künzel U, *et al.* (2018) FRMD8 promotes inflammatory and growth factor signalling  
718 by stabilising the iRhom/ADAM17 sheddase complex. *eLife* 7.
- 719 61. Oikonomidi I, *et al.* (2018) iTAP, a novel iRhom interactor, controls TNF secretion by  
720 policing the stability of iRhom/TACE. *Elife* 7.
- 721 62. Bray F, *et al.* (2018) Global cancer statistics 2018: GLOBOCAN estimates of  
722 incidence and mortality worldwide for 36 cancers in 185 countries. *CA Cancer J Clin*  
723 68(6):394-424.
- 724 63. Rawla P, Sunkara T, & Gaduputi V (2019) Epidemiology of Pancreatic Cancer:  
725 Global Trends, Etiology and Risk Factors. *World J Oncol* 10(1):10-27.
- 726 64. Waters AM & Der CJ (2018) KRAS: The Critical Driver and Therapeutic Target for  
727 Pancreatic Cancer. *Cold Spring Harbor Perspectives in Medicine* 8(9).
- 728 65. Tape CJ, *et al.* (2016) Oncogenic KRAS Regulates Tumor Cell Signaling via Stromal  
729 Reciprocation. *Cell* 165(4):910-920.
- 730 66. Rawla P, Sunkara T, & Barsouk A (2019) Epidemiology of colorectal cancer:  
731 incidence, mortality, survival, and risk factors. *Przegląd gastroenterologiczny*  
732 14(2):89-103.
- 733 67. Cicenás J, *et al.* (2017) KRAS, NRAS and BRAF mutations in colorectal cancer and  
734 melanoma. *Medical oncology (Northwood, London, England)* 34(2):26.
- 735 68. Ponsioen B, *et al.* (2021) Quantifying single-cell ERK dynamics in colorectal cancer  
736 organoids reveals EGFR as an amplifier of oncogenic MAPK pathway signalling. *Nat*  
737 *Cell Biol* 23(4):377-390.
- 738 69. Grieve AG & Rabouille C (2014) Extracellular cleavage of E-cadherin promotes  
739 epithelial cell extrusion. *J Cell Sci* 127(Pt 15):3331-3346.
- 740 70. Ran FA, *et al.* (2013) Genome engineering using the CRISPR-Cas9 system. *Nat*  
741 *Protoc* 8(11):2281-2308.
- 742 71. Bauer DLV, *et al.* (2018) Influenza Virus Mounts a Two-Pronged Attack on Host RNA  
743 Polymerase II Transcription. *Cell Rep* 23(7):2119-2129.e2113.
- 744 72. Molina-Arcas M, *et al.* (2019) Development of combination therapies to maximize the  
745 impact of KRAS-G12C inhibitors in lung cancer. *Science Translational Medicine*  
746 11(510).
- 747  
748  
749

750 **Figure legends**

751

752

753 **Figure 1. iRhoms are required for KRAS-driven shedding of the ERBB ligands by**  
754 **ADAM17**

755

756 **A-D.** HEK293T cells were co-transfected with alkaline-phosphatase (AP)-tagged TGF $\alpha$  and  
757 GFP or GFP-tagged KRAS constructs. Unless specified otherwise, constructs of KRAS4A  
758 were used in all experiments. Overnight medium collection was performed in presence of 0.5  
759  $\mu$ M ADAM10 inhibitor (GI), 0.5  $\mu$ M ADAM10/ADAM17 inhibitor (GW) or with DMSO.

760 **E-F.** Wild-type, iRhom1 KO, iRhom2 KO, or iRhom1/2 double knockout (DKO) HEK293T  
761 cells were transiently co-transfected with AP-tagged TGF $\alpha$  and GFP or GFP-tagged KRAS-  
762 G12V, followed by overnight medium collection.

763 Substrate release is the level of alkaline phosphatase in the medium divided by the total  
764 alkaline phosphatase level. Data are from six biological replicates. Error bars represent  
765 standard deviations and statistical tests were performed using two-tailed student t-test. ns =  
766 p value>0.05, \*\*\*\* = p value<0.0001.

767

768 **Figure S1**

769

770 **A.** Concanavalin A (ConA) enrichment of lysates prepared from iRhom1/2 DKO or WT  
771 HEK293T and immunoblotted for ADAM17, transferrin receptor (TfR) or beta-actin. The lack  
772 of mature ADAM17 (grey arrowhead), compared to immature proADAM17 (black  
773 arrowhead), in the absence of iRhoms demonstrates the loss of all iRhom activity. This  
774 experiment was repeated three times.

775 **Figure 2. KRAS-induced shedding depends on the phosphorylation of the**  
776 **cytoplasmic domain of iRhom2 by the Raf/MEK/ERK pathway**  
777

778 **A.** iRhom1/2 DKO HEK293T cells reconstituted with iRhom2<sup>WT</sup> and iRhom2 lacking the three  
779 primary phosphorylation sites (iRhom2<sup>site1-3</sup>) were co-transfected with GFP or GFP-tagged  
780 KRAS<sup>G12V</sup> and alkaline-phosphatase (AP)-tagged TGF $\alpha$ , and medium was collected  
781 overnight. The right panel shows the percentage of AP release induced by KRAS<sup>G12V</sup> in the  
782 indicated cell lines. Data are from six biological replicates.

783 **B.** iRhom1/2 DKO HEK293T reconstituted with iRhom2<sup>WT</sup> and co-transfected with GFP or  
784 GFP-tagged KRAS<sup>G12V</sup> and AP-TGF $\alpha$  were treated with 10  $\mu$ M U0126 during three hours of  
785 medium collection. Data are from six biological replicates.

786 **C.** HA-based immunoprecipitates and lysates from iRhom1/2 DKO HEK293T reconstituted  
787 with HA-iRhom2<sup>WT</sup> and transfected with GFP or GFP-tagged KRAS<sup>G12V</sup> were immunoblotted  
788 for 14-3-3 $\epsilon$ , ADAM17, HA and GFP. To assess the contribution of Raf/MEK/ERK cascade,  
789 cells were treated with 10  $\mu$ M U0126 for two hours and blotted for phosphorylated ERK1/2  
790 (pERK1/2). Orange arrowhead indicates 14-3-3 $\epsilon$ , black and grey arrowheads indicate  
791 immature proADAM17 and mature ADAM17 respectively, white arrowhead indicates HA-  
792 tagged iRhom2<sup>WT</sup>. The experiment was repeated three times. A schematic of the rationale of  
793 the experiment is shown below the immunoblot.

794 **D.** HEK293T cells were transiently co-transfected with AP-tagged TGF $\alpha$  and GFP or GFP-  
795 tagged ERK-activating oncogenes SRC<sup>Y530F</sup>, KRAS<sup>G12V</sup>, BRAF<sup>V600E</sup>, HRAS<sup>G12V</sup>, followed by  
796 overnight medium collection. Data are from six biological replicates.

797 Substrate release is the level of released alkaline phosphatase in the medium divided by the  
798 total alkaline phosphatase level. Error bars represent standard deviations and statistical  
799 tests were performed using two-tailed student t-test. ns = p value>0.05, \*\*\*\* = p  
800 value<0.0001.

801  
802 **Figure S2**  
803

804 **A.** Lysates from iRhom1/2 DKO HEK293T cells reconstituted with HA-tagged iRhom2<sup>WT</sup> or  
805 iRhom2<sup>site1-3</sup> were immunoblotted for HA, ADAM17 and beta-actin. Grey and black  
806 arrowheads indicate mature and immature ADAM17 respectively. iRhom2 and mature  
807 ADAM17 levels from at least three biological replicates were quantified relative to beta-actin  
808 level using ImageJ.

809 **B.** HEK293T cells transfected with GFP or GFP-tagged SRC<sup>Y530F</sup>, KRAS<sup>G12V</sup>, BRAF<sup>V600E</sup>,  
810 HRAS<sup>G12V</sup>, untagged AKT1<sup>E17K</sup> were immunoblotted for oncogene expression (GFP and  
811 AKT1), induction of phosphorylated ERK1/2 (pERK1/2) or for beta-actin. The level of  
812 phosphorylated SRC and AKT were probed as a control of their constitutive activity. The  
813 experiment was performed in biological triplicates.

814 **C.** HEK293T cells were transiently co-transfected with AP-tagged AREG and GFP or GFP-  
815 tagged KRAS<sup>G12V</sup>, BRAF<sup>V600E</sup>, untagged AKT1<sup>E17K</sup>. Overnight medium collection was  
816 performed in three biological replicates. Substrate release is the level of released alkaline  
817 phosphatase in the medium divided by the total alkaline phosphatase level. Error bars  
818 represent standard deviations and statistical tests were performed using two-tailed student t-  
819 test. \* = p value<0.05, \*\*\*\* = p value<0.0001.

820 **Figure 3. Cancer-associated mutations in iRhom2 potentiate KRAS-induced**  
821 **shedding of ERBB ligands**

822

823 **A.** Schematic of the N-terminal domain of iRhom2 with the three main sites of  
824 phosphorylation and the conserved region that harbours mutations causing tylosis with  
825 oesophageal cancer (TOC). The four analysed TOC mutations are shown in the insert.

826 **B-C.** iRhom1/2 DKO HEK293T cells were reconstituted with iRhom2<sup>WT</sup> or with an iRhom2  
827 variant harbouring one of the TOC mutations or the three mutations combined: T+Y+L  
828 (I186T, D188Y, P189L) or T+N+L (I186T, D188N, P189L). Upon co-transfection with GFP or  
829 GFP-tagged KRAS<sup>G12V</sup>, and alkaline-phosphatase (AP)-tagged AREG or EGF, overnight  
830 collection of medium was performed in biological triplicates. Substrate release is the level of  
831 released alkaline phosphatase in the medium divided by the total alkaline phosphatase level.  
832 The far right panels show the percentage of AP-AREG release induced by KRAS<sup>G12V</sup> in the  
833 indicated cell lines. Error bars represent standard deviations and statistical tests were  
834 performed using two-tailed student t-test. \*\*\* = p value<0.001.

835

836 **Figure S3**

837

838 **A.** Concanavalin A (ConA) enrichment of lysates from iRhom1/2 DKO HEK293T cells  
839 reconstituted with HA-tagged iRhom2<sup>WT</sup> or iRhom2 variant harbouring one or a combination  
840 of the TOC mutations, followed by immunoblotting for ADAM17 and calreticulin. Black and  
841 grey arrowheads indicate immature and mature ADAM17 respectively. Stable expression of  
842 HA-tagged iRhom2 variants was detected by HA and beta-actin antibodies. iRhom2 and  
843 mature ADAM17 levels from three biological replicates were quantified using ImageJ relative  
844 to beta-actin and total ADAM17 (immature and mature) respectively.

845 **B.** iRhom1/2 DKO HEK293T cells reconstituted with iRhom2<sup>WT</sup> or with an iRhom2 variant  
846 harbouring one of the TOC mutations or the three mutations combined: T+Y+L (I186T,  
847 D188Y, P189L) or T+N+L (I186T, D188N, P189L) were co-transfected with GFP or GFP-  
848 tagged KRAS<sup>G12V</sup>, and alkaline-phosphatase AP-EGF. Overnight collection of medium was  
849 performed in biological triplicates.



850 **Figure 4. iRhoms are required for KRAS-driven tumorigenesis**

851

852 **A.** Release of endogenous amphiregulin (AREG) from control (Ctrl) and iRhom1/2 DKO lung  
853 cancer cells A549 was measured after overnight collection in biological triplicates. AREG  
854 concentration determined by ELISA was normalised to the total protein concentration in  
855 A549 cells, and the average level of A549 Ctrl was defined as the reference (100%). Unless  
856 specified otherwise, ELISA experiments are similarly normalised in all experiments. Error  
857 bars represent standard deviations and statistical tests were performed using two-tailed  
858 student t-test. \*\*\*\* = p value<0.0001.

859 **B-C.** Spheroid growth of Ctrl and DKO A549 cells in ultra-low attachment plates was  
860 performed for 13 days and treated with 2  $\mu$ M ADAM10 inhibitor (GI) or 2 $\mu$ M  
861 ADAM17/ADAM10 inhibitor (GW) when indicated. Cell viability quantified using CellTiter Glo  
862 was normalised to Ctrl. At least three biological replicates were performed per condition,  
863 error bars represent standard deviations and statistical tests were performed using two-tailed  
864 student t-test. ns = p value>0.05, \*\*\*\* = p value<0.0001. Representative spheroids of B are  
865 shown as insets, scale bar = 0.2 mm.

866 **D.** Tumour volume of Ctrl and iRhom1/2 DKO A549 xenografts assessed twice weekly,  
867 starting 7 days post injection of  $10^6$  cells in immunodeficient NSG mice (n=6 mice per cell  
868 line). Error bars represent standard errors of the mean and statistical tests were performed  
869 using two-tailed student t-test. \*\* = p value<0.01, \*\*\* = p value<0.001. Insets show  
870 representative tumours, scale bar = 5 mm.

871

872 **Figure S4**

873

874 **A.** Concanavalin A (ConA) enrichment of lysates from Ctrl and iRhom1/2 DKO A549 cells,  
875 immunoblotted for ADAM17, transferrin receptor (TfR) or beta-actin. The absence of mature  
876 ADAM17 (grey arrowhead) compared to immature proADAM17 (black arrowhead)  
877 demonstrates the lack of iRhom activity. The experiment was repeated three times.

878 **B.** Cell proliferation of Ctrl and iRhom1/2 DKO A549 cells was measured five days after  
879 seeding the cells using CellTiter Glo. The luminescence level was normalised to the level of  
880 A549 Ctrl (100%). Three biological replicates were performed per cell line, the error bars  
881 represent standard deviations and the statistical tests were performed using two-tailed student  
882 t-test. \*\*=p value <0.01.

883 **C.** Representative images of A549 spheroids performed in triplicate are shown after 13 days  
884 treatment with 2  $\mu$ M GI or 2  $\mu$ M GW when indicated. scale bar = 0.2 mm.

885 **Figure 5. iRhom2 phosphorylation regulates ADAM17-dependent release of ERBB**  
886 **ligand and tumour spheroid growth in lung cancer cells**

887

888 **A.** iRhom1/2 DKO A549 cells reconstituted with HA-tagged iRhom2<sup>WT</sup> or phosphomutant  
889 iRhom2 (iRhom2<sup>pMUT</sup>) were immunoblotted for HA, ADAM17 and beta-actin. Grey and black  
890 arrowheads indicate mature and immature ADAM17 respectively. iRhom2 and mature  
891 ADAM17 levels from five biological replicates were quantified relative to beta-actin level  
892 using ImageJ.

893 **B.** Release of endogenous amphiregulin (AREG) from DKO A549 parental cells, or those  
894 stably expressing iRhom2<sup>WT</sup> or iRhom2<sup>pMUT</sup> was measured in six biological replicates by  
895 ELISA after overnight collection and normalised as described previously. Error bars  
896 represent standard deviations and statistical tests were performed using two-tailed student t-  
897 test. \*\*\*\* = p value<0.0001.

898 **C.** HA immunoprecipitates and lysates from A549 DKO cells stably expressing HA-tagged  
899 iRhom2<sup>WT</sup> or iRhom2<sup>pMUT</sup>, immunoblotted for 14-3-3ε, HA and actin. Orange and open  
900 arrowheads indicate 14-3-3ε and HA-tagged iRhom2 constructs respectively. This  
901 experiment was performed in biological triplicates.

902 **D.** Spheroid growth of DKO A549 parental cells, or those stably expressing iRhom2<sup>WT</sup> or  
903 iRhom2<sup>pMUT</sup> was measured after 14 days in five biological replicates by CellTiter Glo and  
904 normalised as described previously. Error bars represent standard deviations and statistical  
905 tests were performed using two-tailed student t-test. \*\* = p value<0.01, \*\*\* = p value<0.001.  
906

907 **Figure S5**

908

909 **A.** Release of endogenous AREG from DKO A549 parental cells or those stably expressing  
910 iRhom2<sup>WT</sup>, measured by ELISA after four hours of treatment with DMSO or 10 μM U0126.  
911 Substrate release was normalised as previously described, error bars represent standard  
912 deviations and statistical tests were performed using two-tailed student t-test. \*\*\* = p  
913 value<0.001, \*\*\*\* = p value<0.0001.

914 **Figure 6. Cancer-associated mutations in iRhom2 increase RAS activity and drive a**  
915 **positive feedback loop in lung cancer cells**

916

917 **A.** iRhom1/2 DKO A549 cells reconstituted with HA-tagged TOC iRhom2<sup>D188N</sup> or iRhom2<sup>WT</sup>  
918 were immunoblotted for HA, ADAM17 and beta-actin. Grey and black arrowheads indicate  
919 mature and immature ADAM17 respectively. iRhom2 and mature ADAM17 levels from three  
920 biological replicates were quantified relative to beta-actin level using ImageJ.

921 **B.** Release of endogenous amphiregulin (AREG) from DKO A549 parental cells, or those  
922 stably expressing iRhom2<sup>WT</sup> or iRhom2<sup>D188N</sup>, was measured in three biological replicates by  
923 ELISA after overnight medium collection and normalised as described previously. Error bars  
924 represent standard deviations and statistical tests were performed using two-tailed student t-  
925 test. \*\*\* = p value < 0.001.

926 **C.** Spheroid growth of DKO A549 parental cells, or those stably expressing iRhom2<sup>WT</sup> or  
927 iRhom2<sup>D188N</sup>, was measured after 14 days in five biological replicates by CellTiter Glo and  
928 normalised as described previously. Error bars represent standard deviations and statistical  
929 tests were performed using two-tailed student t-test. \*\* = p value < 0.01.

930 **D-E.** Active RAS was assayed in Ctrl, iRhom1/2 DKO parental A549 cells, or DKO cells  
931 stably expressing HA-tagged iRhom2<sup>WT</sup> or TOC iRhom2<sup>D188N</sup> using RAS-GTP pulldown.  
932 Cells were treated with 1 µM the pan-ERBB inhibitor afatinib for 20 hours when indicated,  
933 and immunoblotted for RAS, HA or beta-actin. The experiments were performed in biological  
934 triplicates.

935 **F.** Conditioned medium from iRhom1/2 DKO A549 cells stably expressing iRhom2<sup>WT</sup> or TOC  
936 iRhom2<sup>D188N</sup> was used to stimulate the ERBB1/EGFR reporter cell line A431 treated with 1  
937 µM afatinib when indicated. Following stimulation, A431 cells were immunoblotted for  
938 ERK1/2, phosphorylated ERK1/2 (pERK1/2) and beta-actin. The experiment was performed  
939 in biological triplicates.

940

941 **Figure S6**

942

943 **A-B.** Quantification of active RAS-GTP level from three biological replicates described in Fig.  
944 6D-E was performed using ImageJ. The level of RAS-GTP was normalised to the loading  
945 control beta-actin. Error bars represent standard deviations and statistical tests were  
946 performed using two-tailed student t-test. ns = p value > 0.05, \*\* = p value < 0.01.

947 **C.** Quantification of phosphorylated ERK1/2 (pERK1/2) level from three biological replicates  
948 described in Fig. 6F was performed using ImageJ. The level of pERK1/2 was normalised on  
949 the loading control beta-actin. Error bars represent standard deviations and statistical tests  
950 were performed using two-tailed student t-test. \* = p value < 0.05, \*\*\* = p value < 0.01.

951 **Figure 7. iRhom activity drives an ERBB-dependent feedback loop on oncogenic**  
952 **KRAS**

953

954 **A.** Activation of ERK1/2 by oncogenic KRAS<sup>GTP</sup> triggers the phosphorylation of iRhom2 and  
955 subsequent recruitment of the phospho-binding proteins 14-3-3. Together with mutations  
956 responsible for tylosis with oesophageal cancer (TOC), this induces the ADAM17-dependent  
957 release of ERBB ligands into the extracellular medium. Upon binding their ligands, ERBBs  
958 maintain KRAS in the active GTP-bound state, thus enabling a positive feedback loop for  
959 KRAS oncogenesis. This feedback loop can be inhibited by blocking ERBB signalling with  
960 afatinib.

# Figure 1

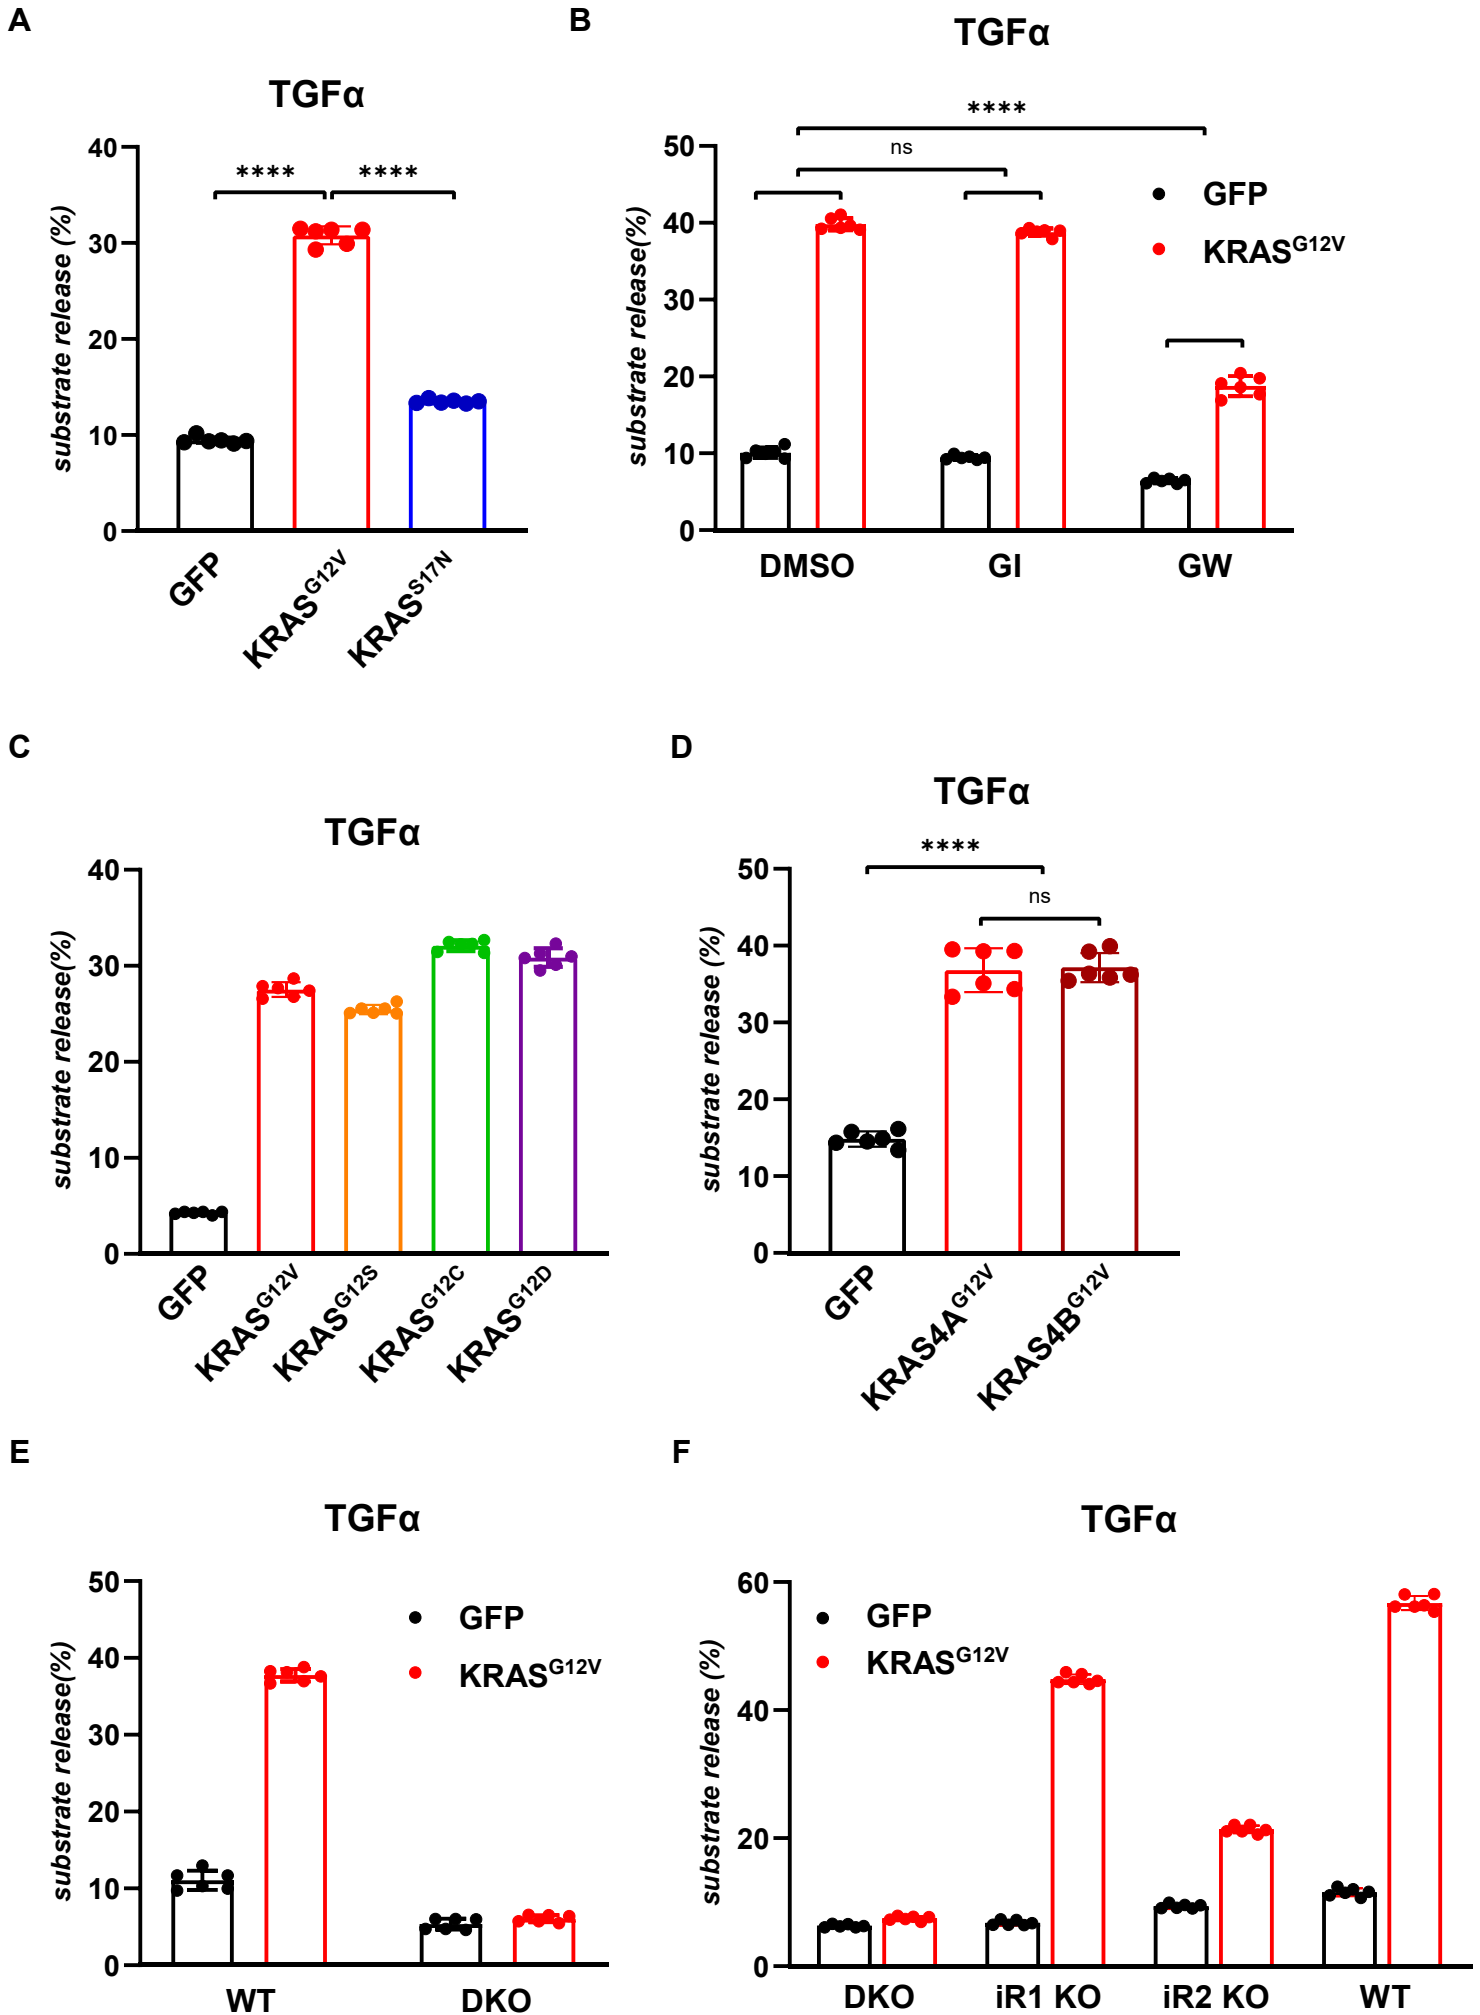

## Figure S1

**A**

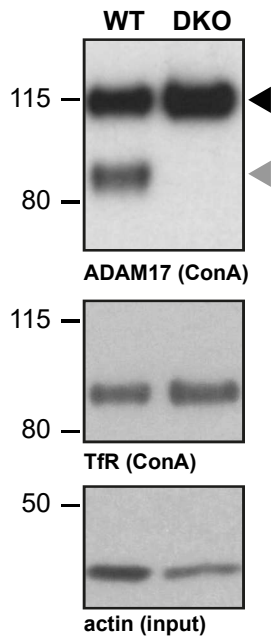

## Figure 2

A

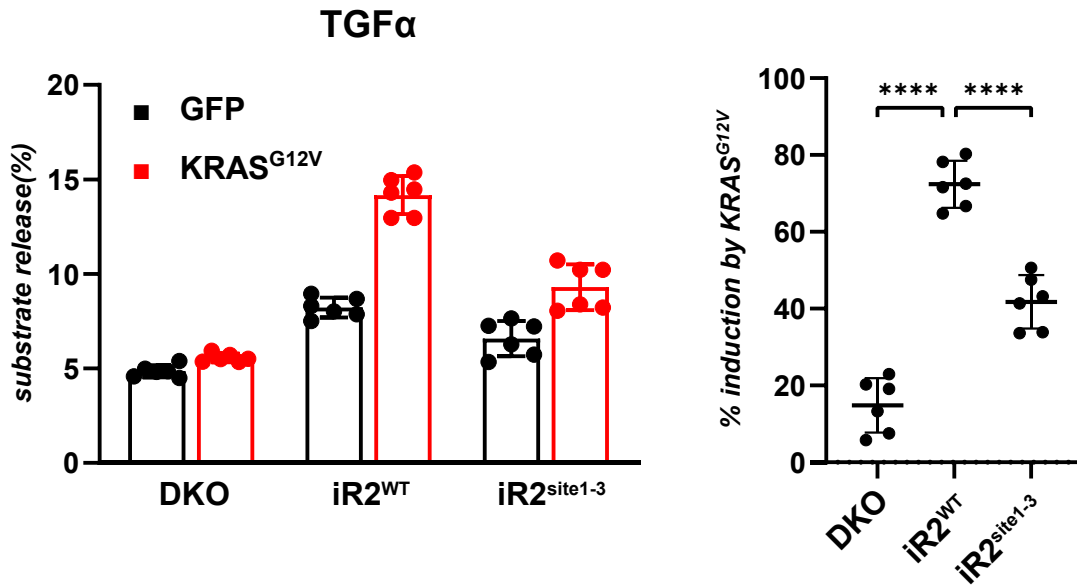

B

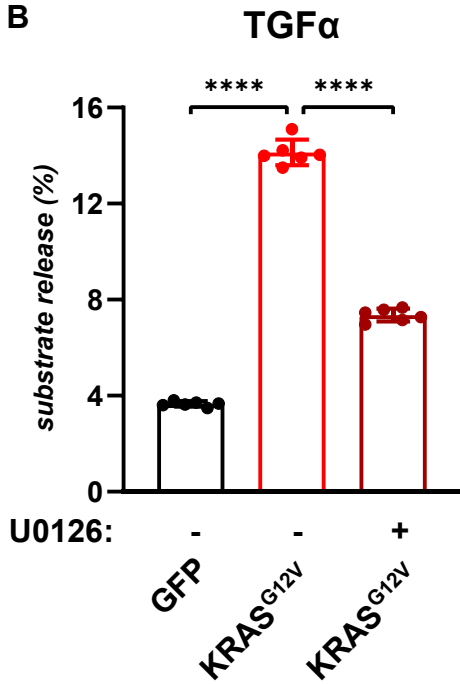

C

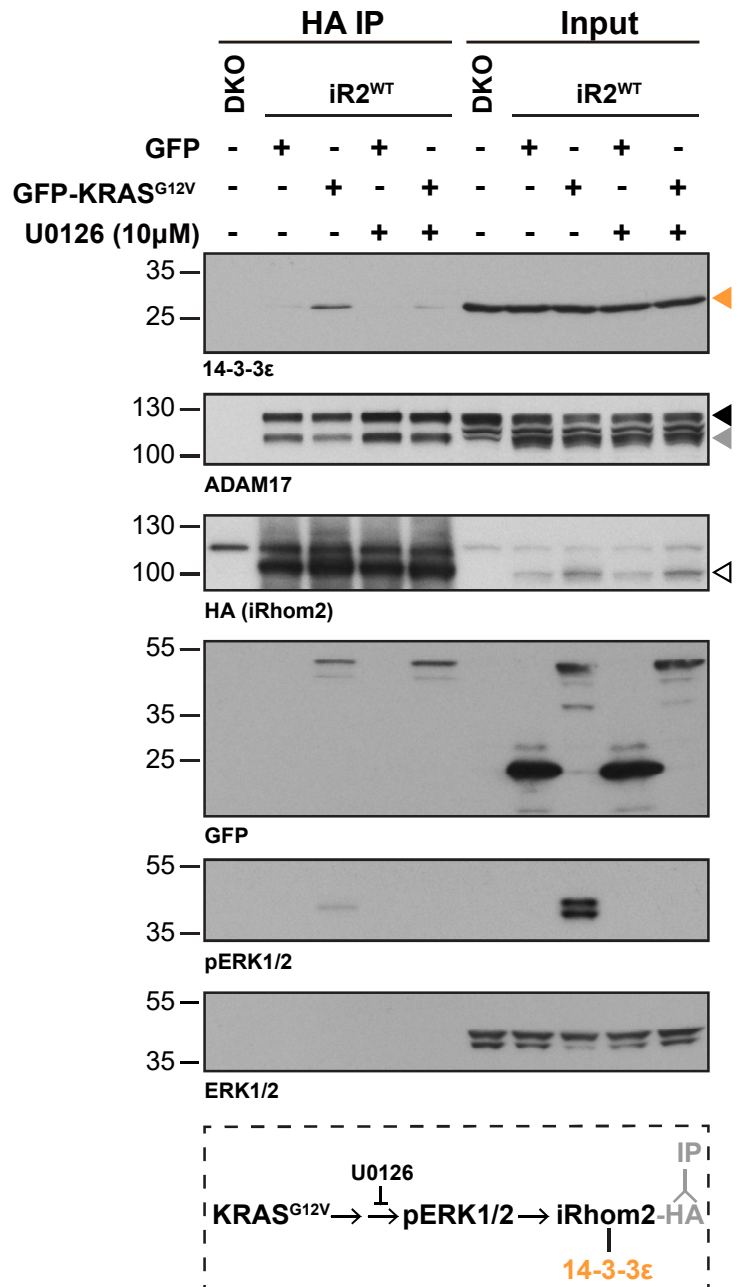

D

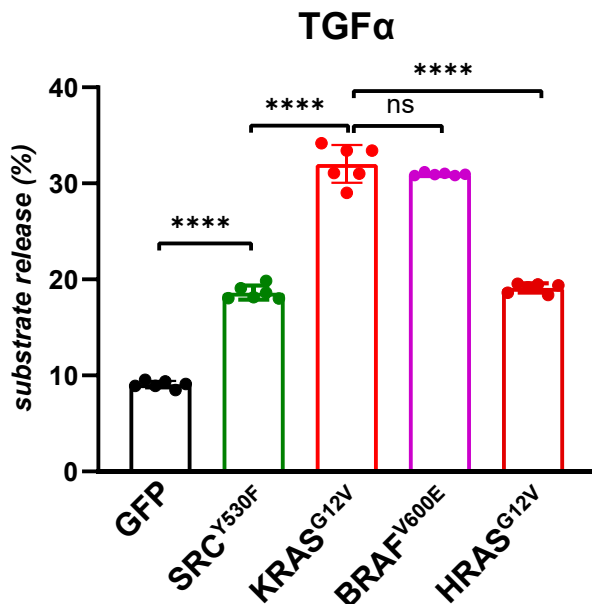

## Figure S2

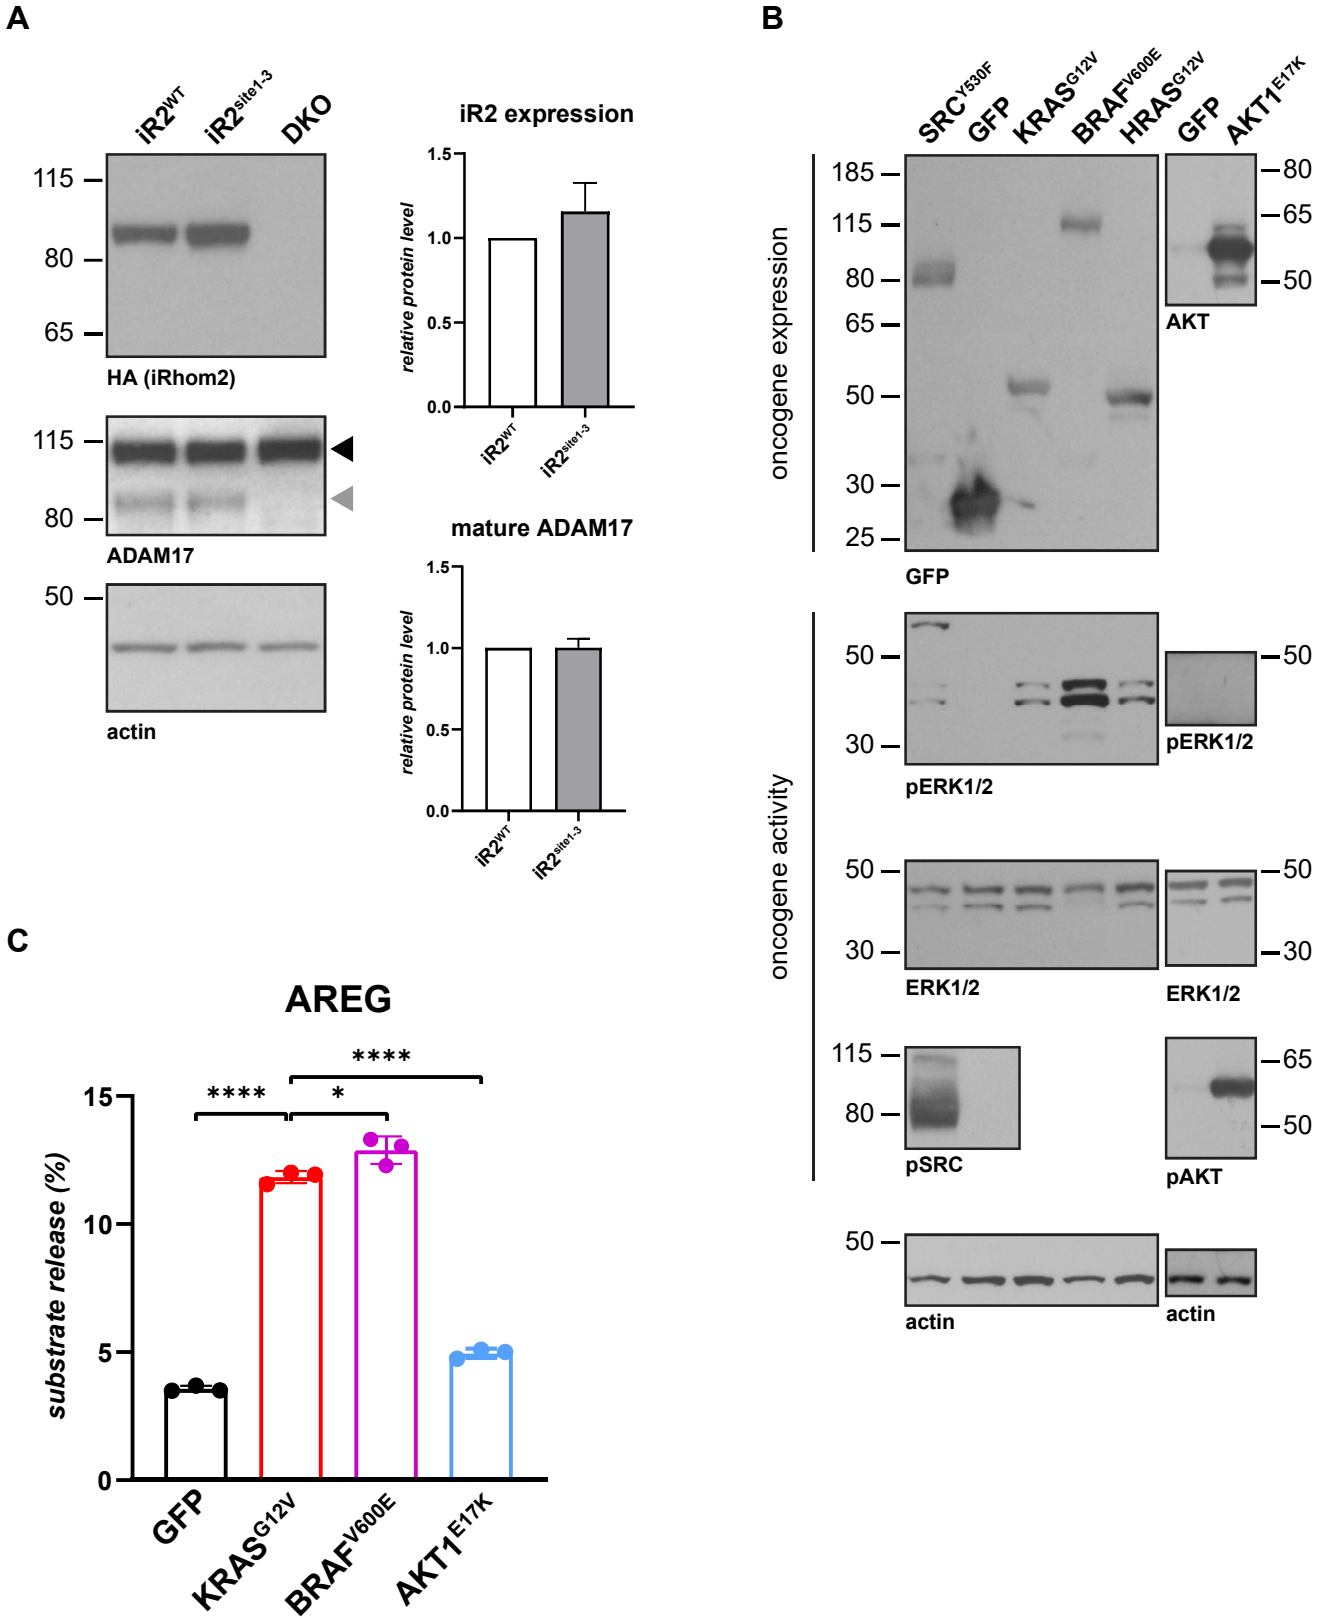



### Figure 3

A

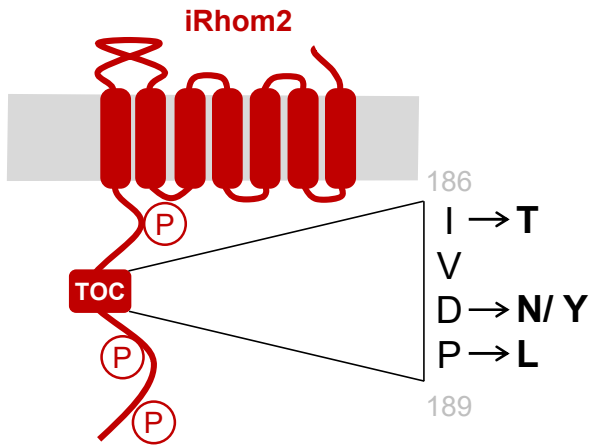

B

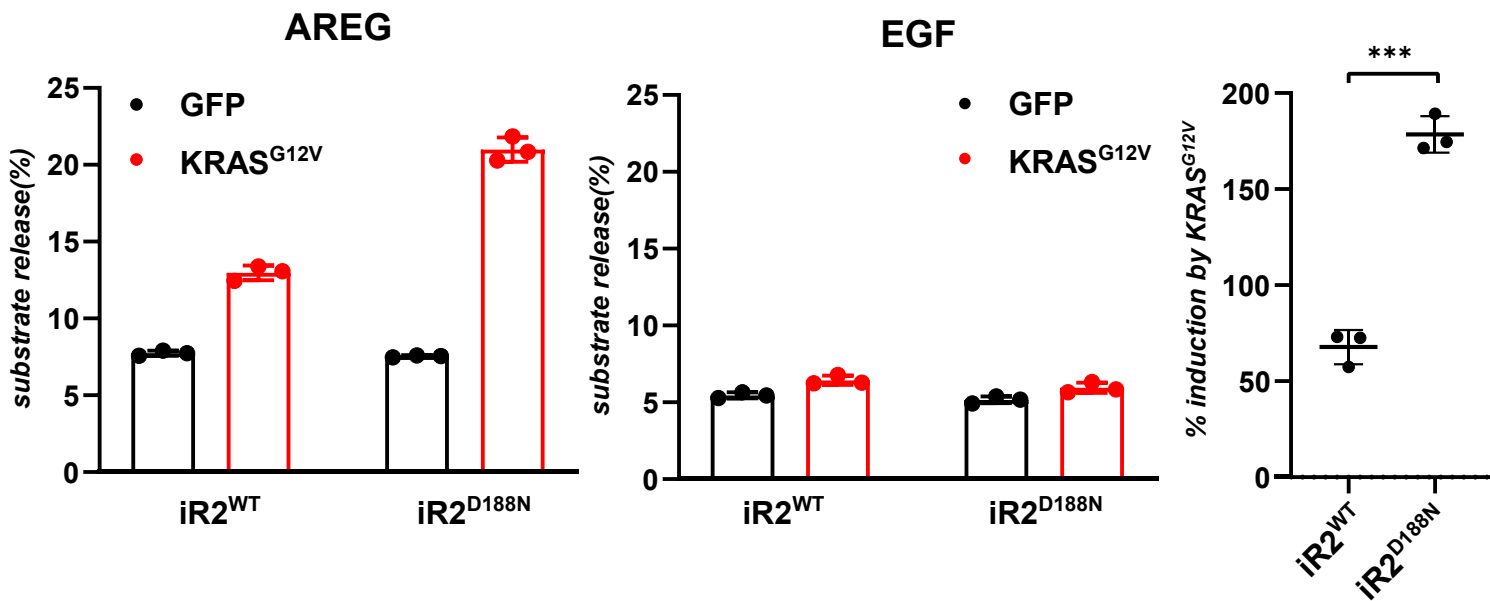

C

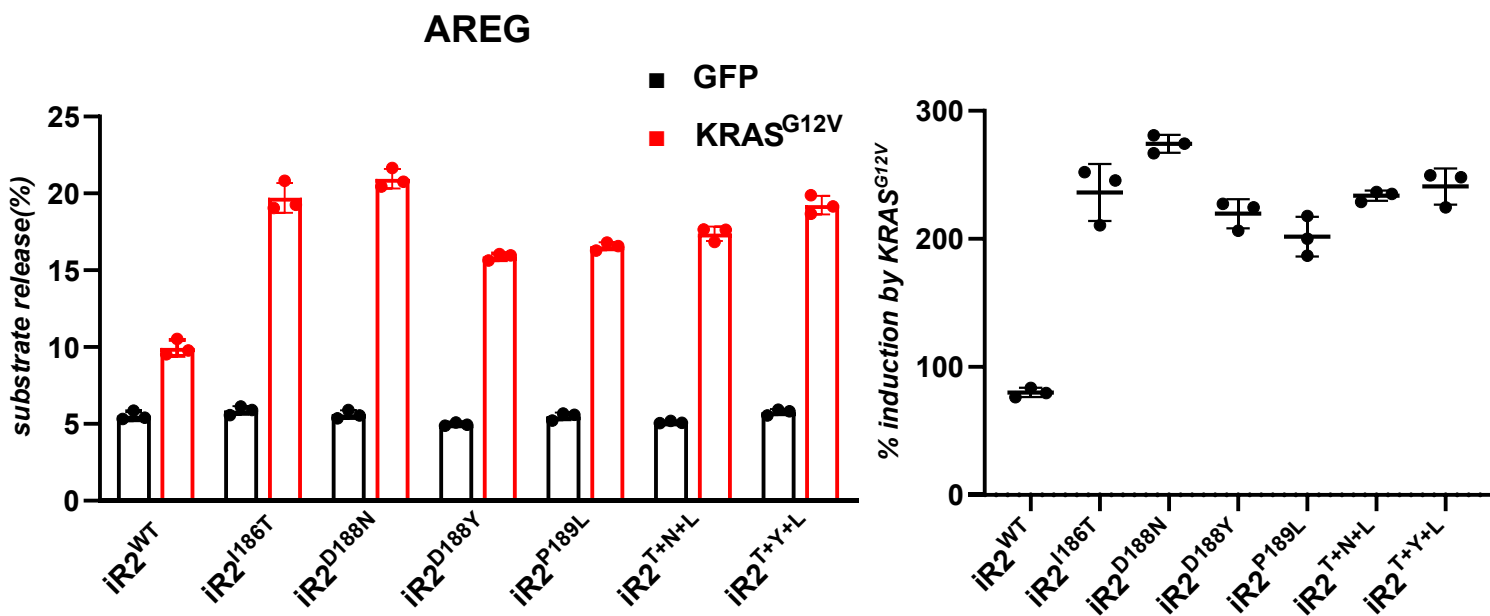

## Figure S3

**A**

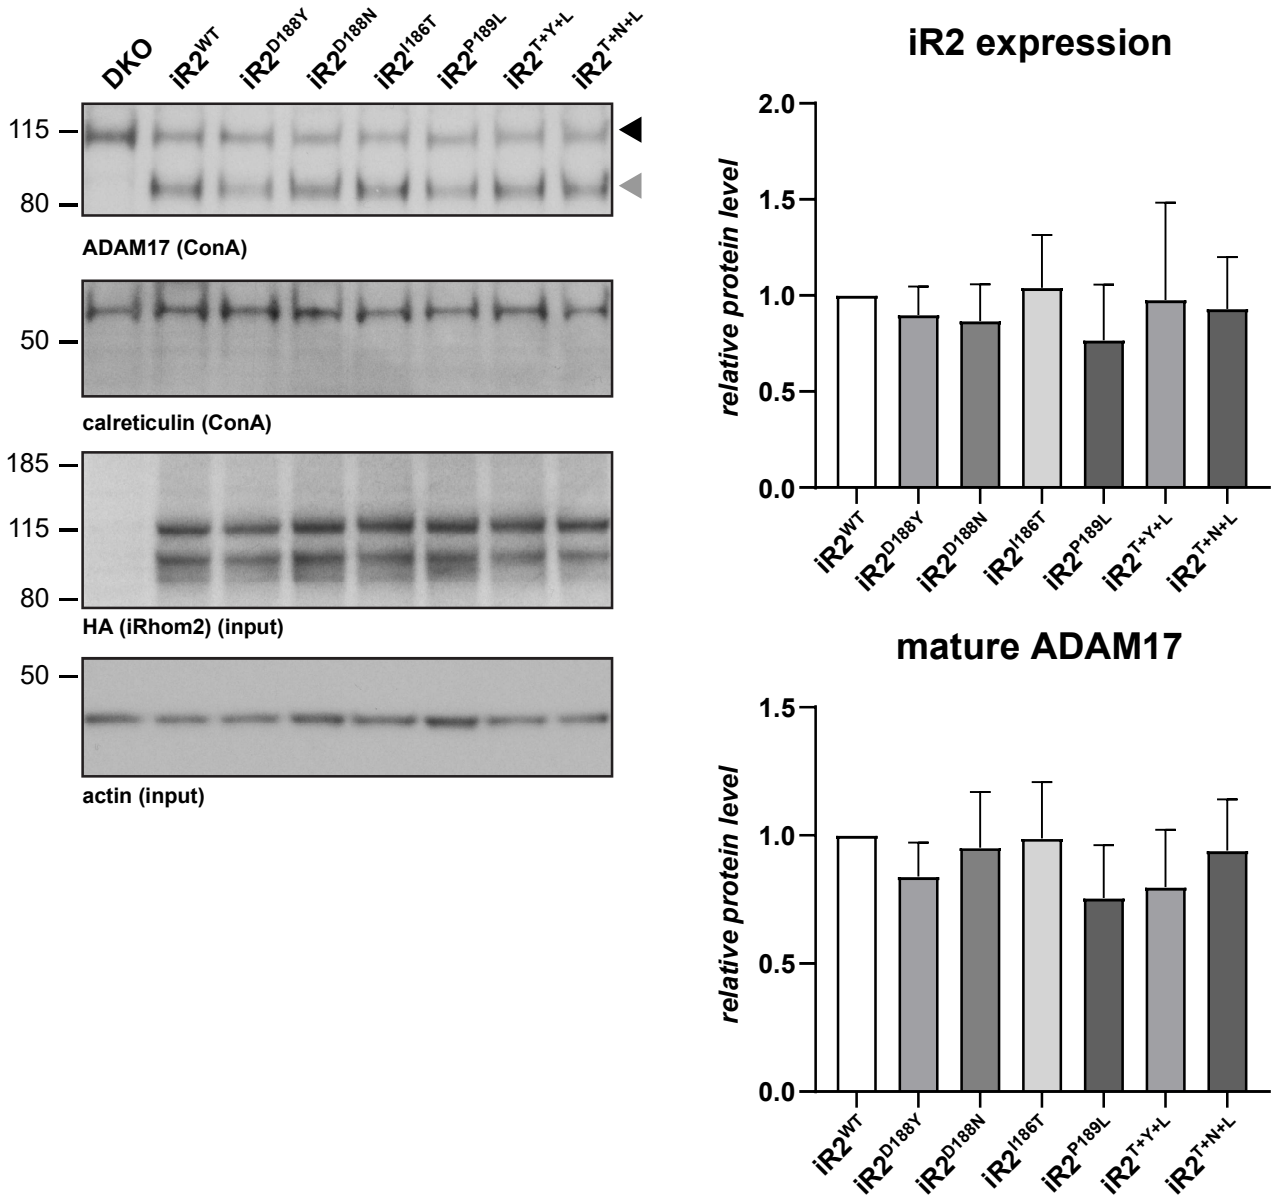

**B**

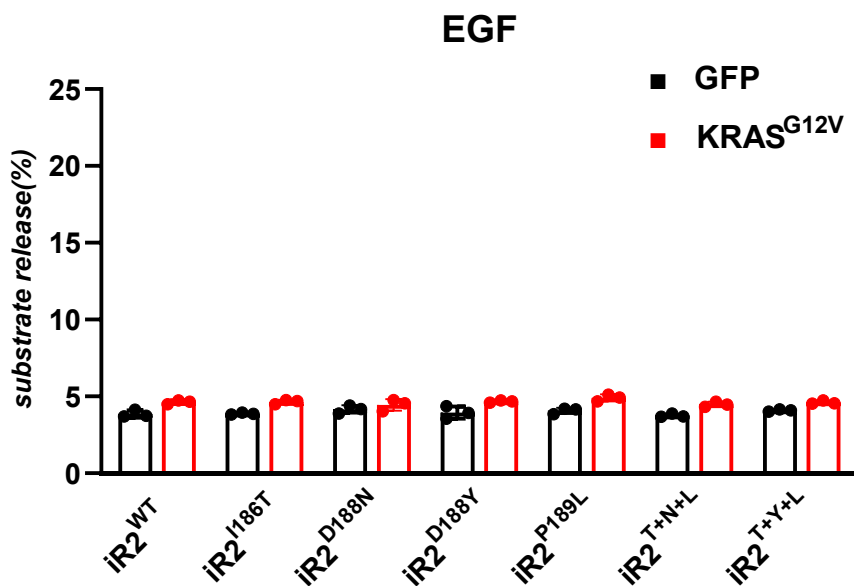

## Figure 4

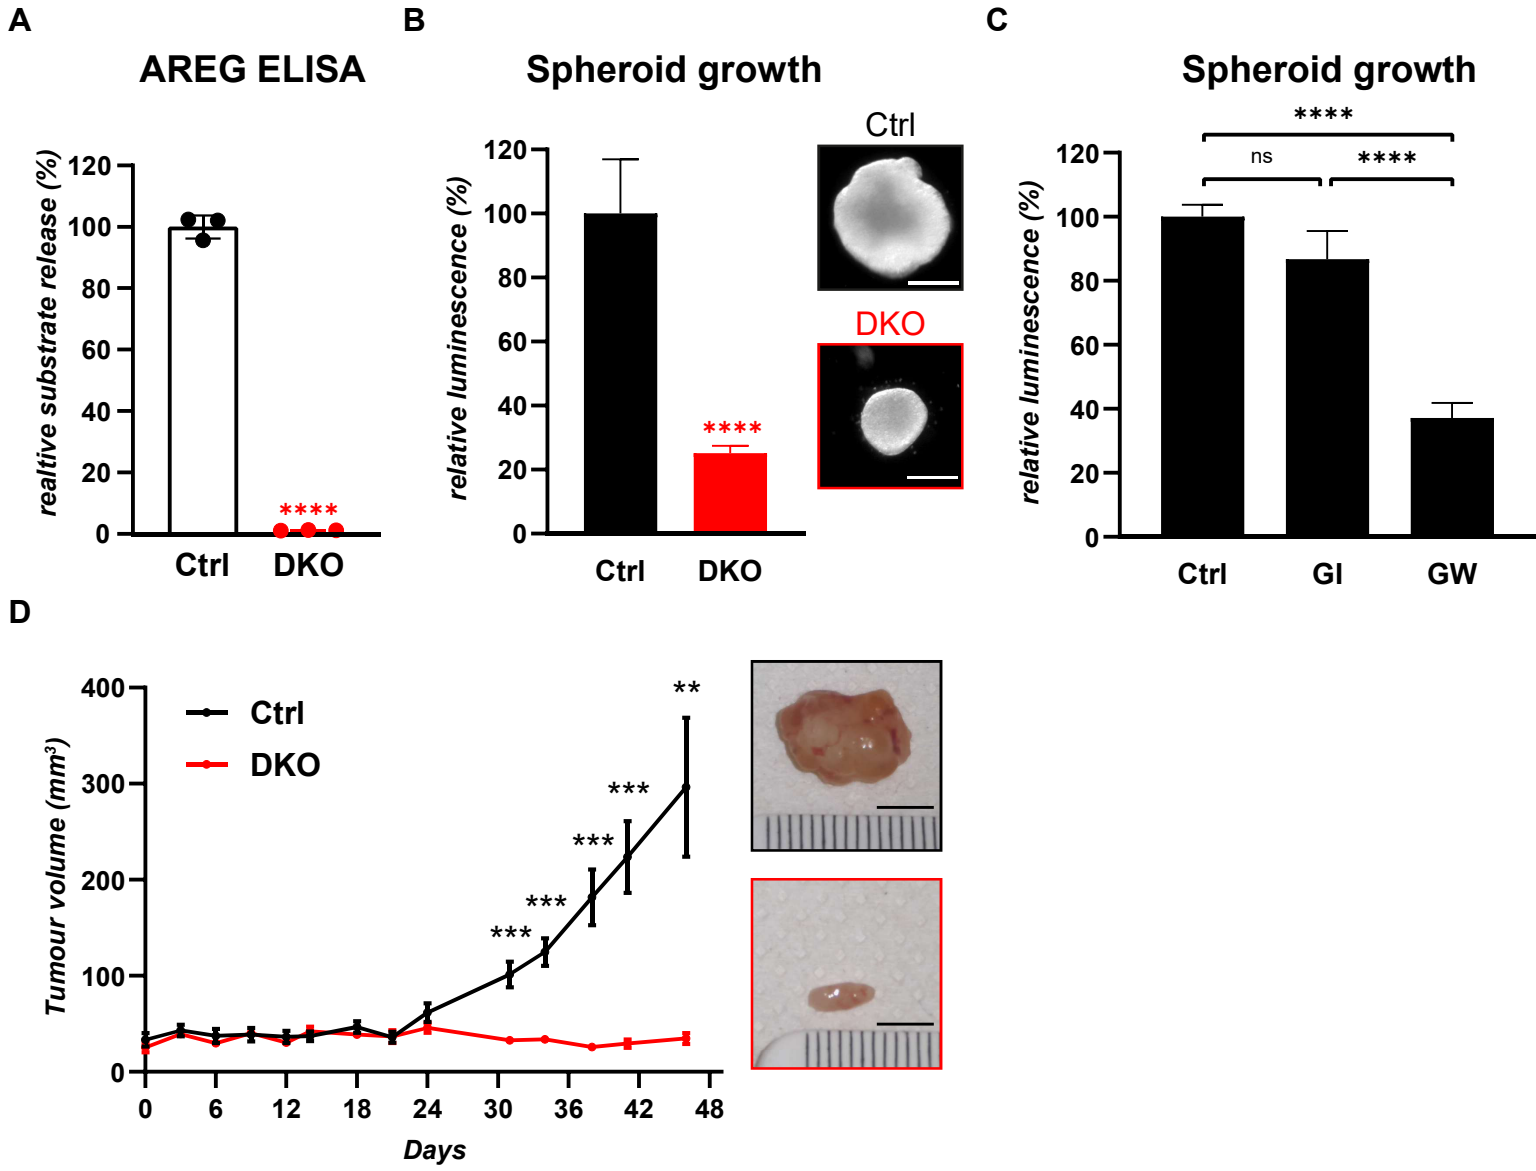

## Figure S4

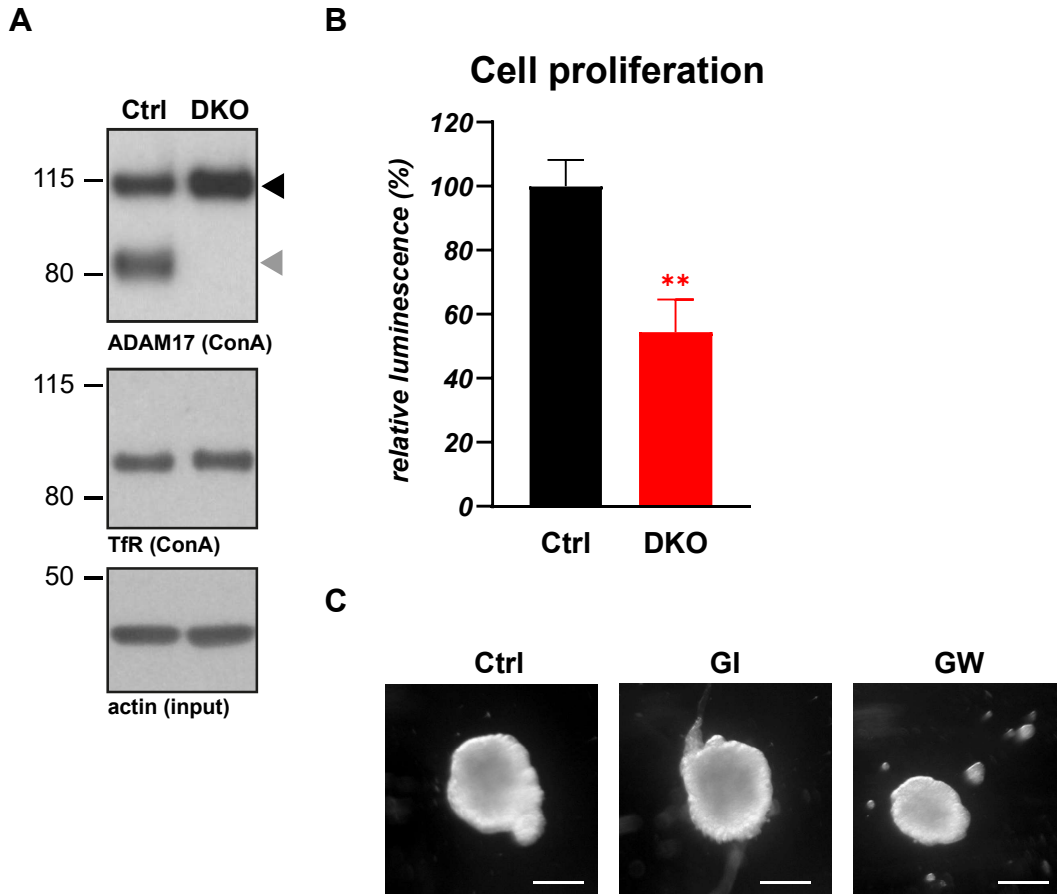

## Figure 5

A

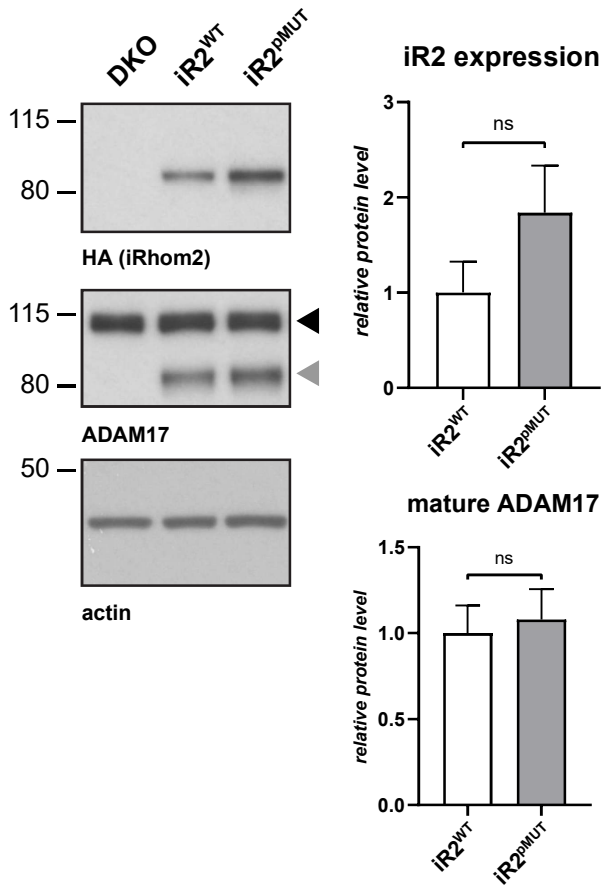

C

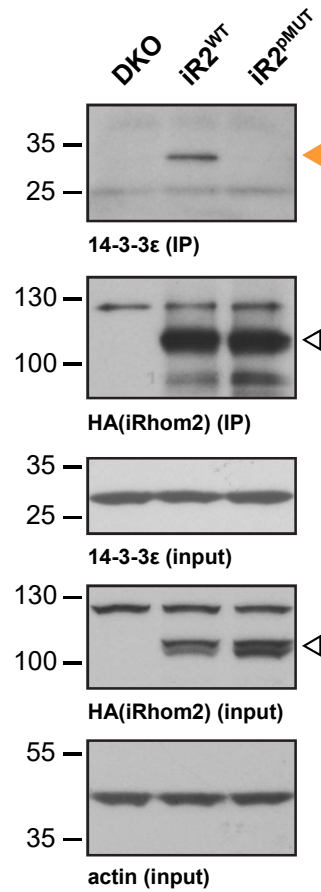

B

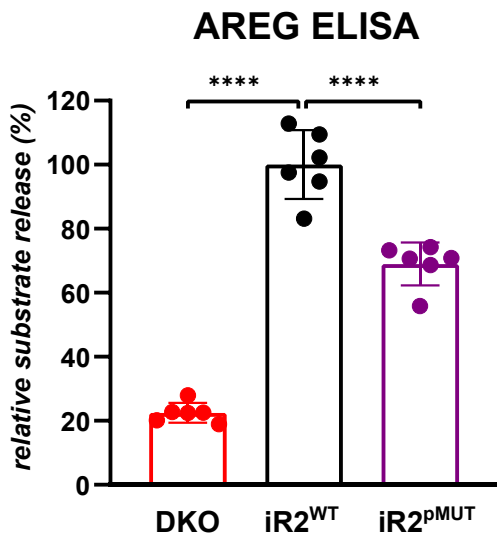

D

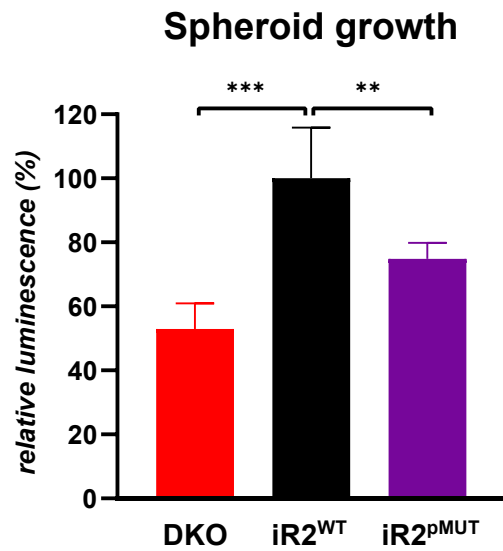

## Figure S5

A

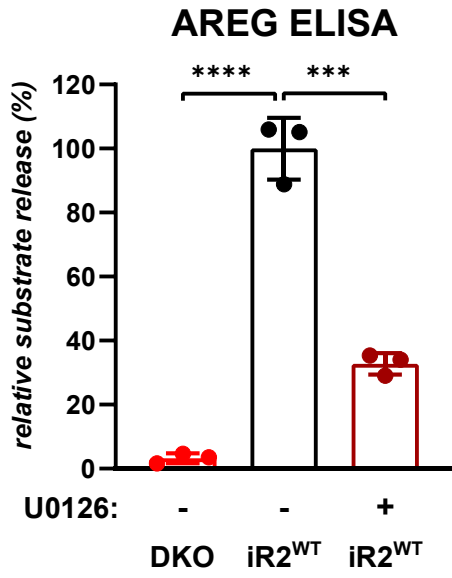

## Figure 6

**A**

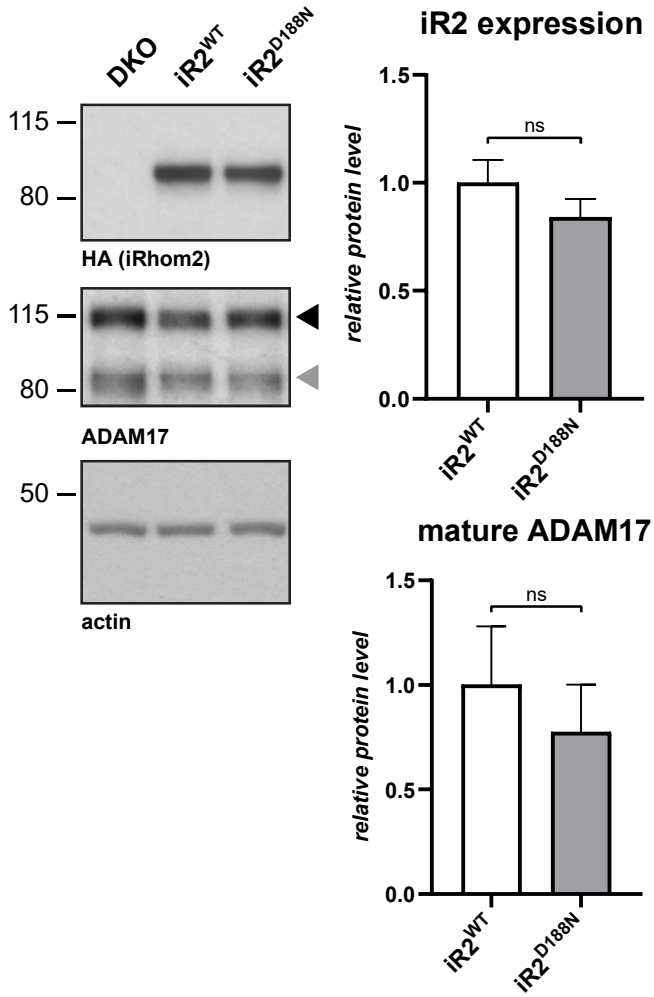

**B**

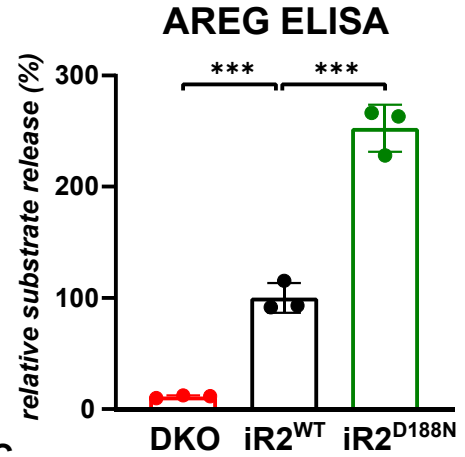

**C**

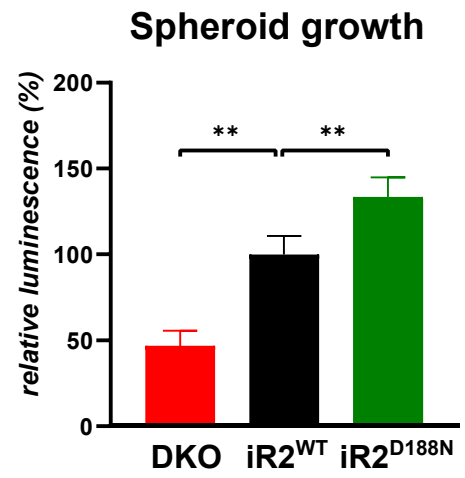

**D**

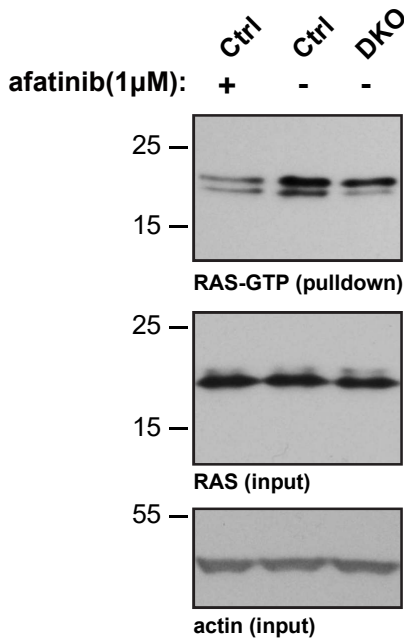

**E**

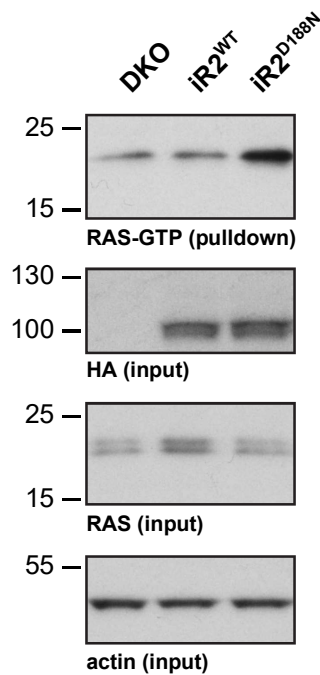

**F**

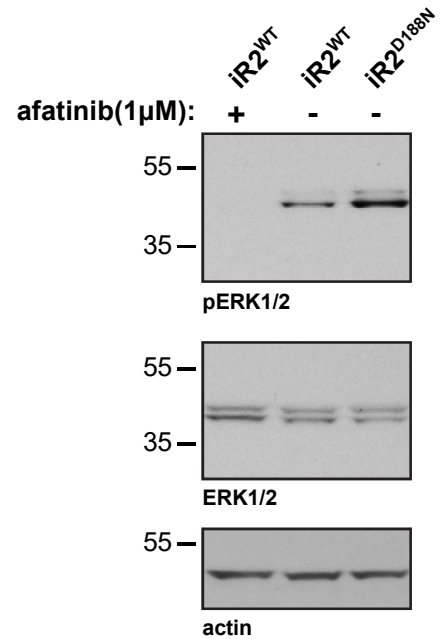

## Figure S6

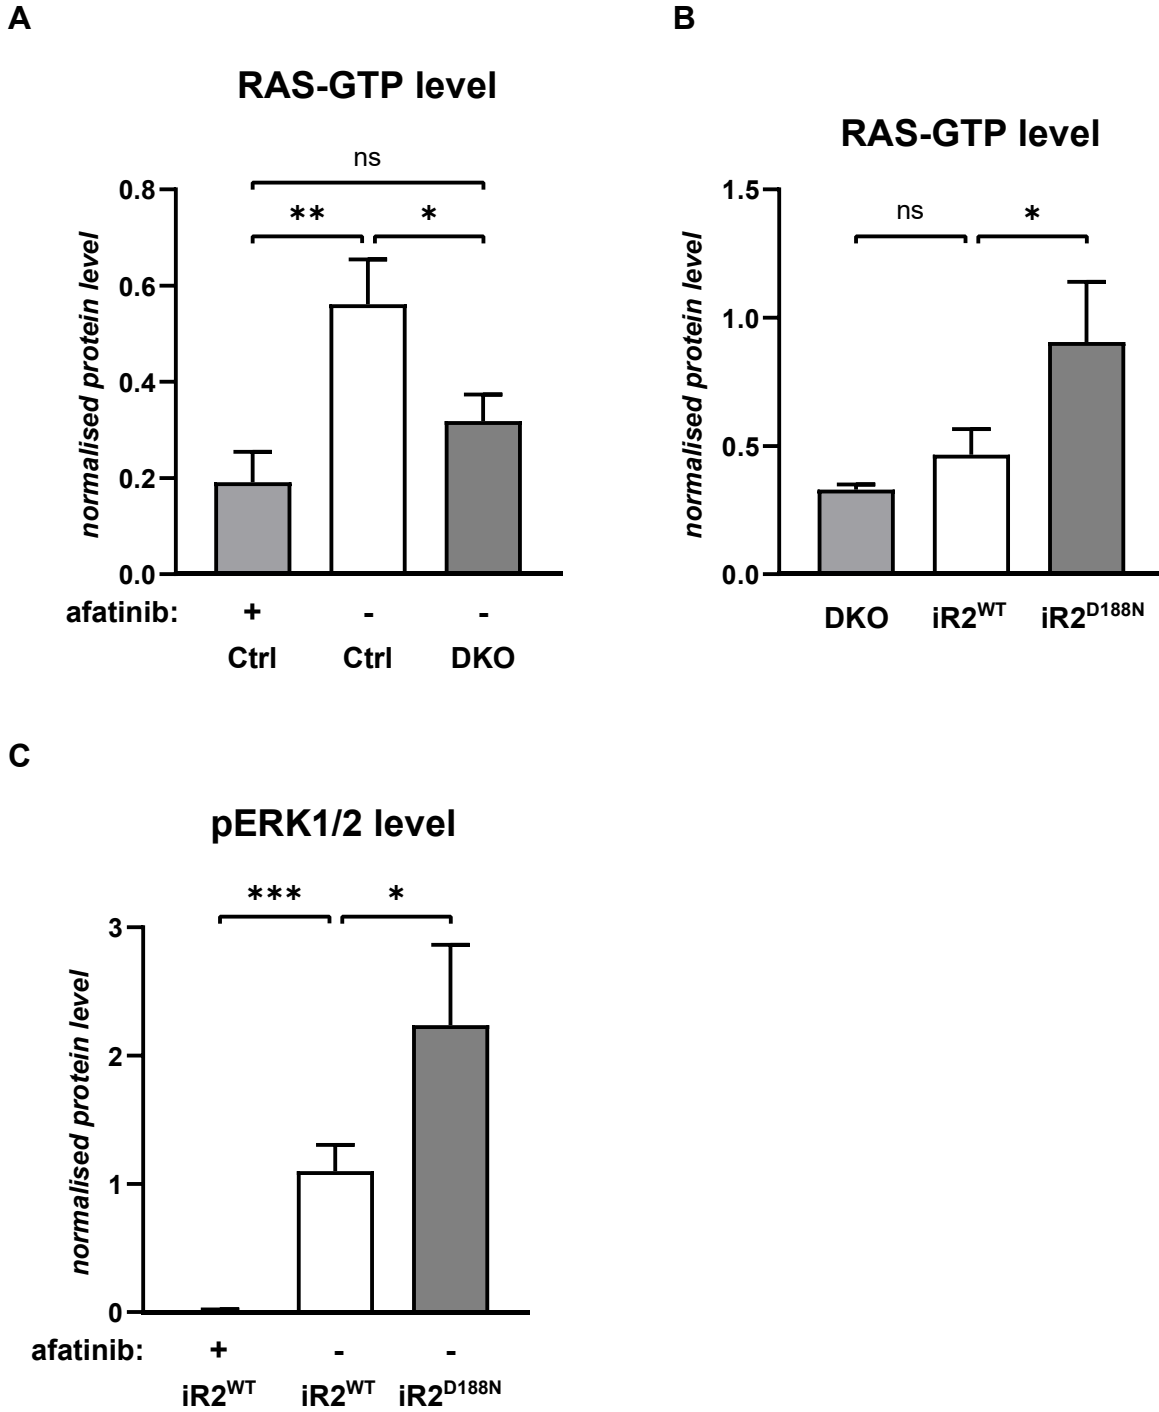



## Figure 7

A

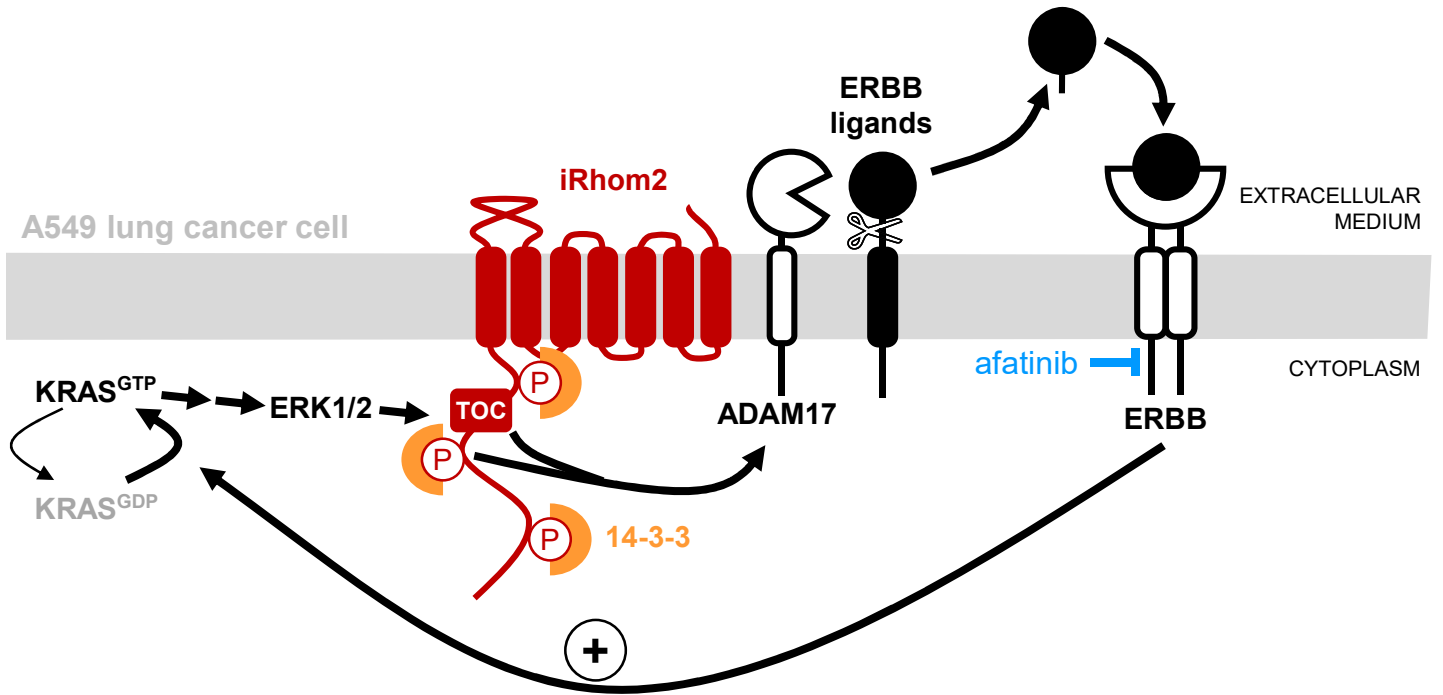

Source: http://biorxiv.org/content/10.1101/2021.08.06.455383v1.full.pdf
